# Supplementary material for: Prediction of protein interactions between pine and pine wood nematode using deep learning and multi-dimensional feature fusion
Source: Front Plant Sci. 2024 Dec 2;15:1489116. doi: 10.3389/fpls.2024.1489116 (PMC11646721; doi:10.3389/fpls.2024.1489116)
Supplement: Supplementary file 2 [file Table1.xlsx]

## Sheet: Sheet1
Node1	Node2
BxCYP33D3_3	pdb2lml
BxSapB1_2	pdb2lq3
A0A1I7RL37_BURXY	7mzw
Bx_cpl_3_4	pdb2kzv
BxATG16_3	pdb2lf2
Bx_cpl_3_4	pdb5vso
I0QYY0_9GAMM	pdb2lnu
BxCYP33C4_5	pdb6kna
I0QYY0_9GAMM	pdb4lej
BxSapB1_1	pdb8ftw
Bx_tlp_1_5	pdb6xry
Bx_tlp_1_4	pdb4lej
cyp_33C9_2	pdb5krw
BxATG16_4	pdb2lek
Bx_Prx_5	pdb2mk2
BxSapB1_1	2kcx
cyp_33C9_1	pdb7wcg
Bx_tlp_1_4	pdb5ks6
Bx_tlp_1_5	pdb2kif
BxATG16_3	pdb2kzv
cyp_33C9_5	pdb7jyn
Bx_cpl_3_3	pdb6pqm
cyp_33C9_2	pdb6nu4
Bx_cpl_3_3	pdb3sdq
cyp_33C9_2	pdb6amv
A0A1I7RL37_BURXY	pdb2lni
BxATG16_4	pdb5vso
I0QYY0_9GAMM	pdb2lmd
BxCYP33D3_3	pdb2nbn
BxCYP33C4_5	pdb2n66
BxCYP33D3_3	pdb7sxb
Bx_cpl_2_5	pdb6xr6
A0A1I7SCF8_BURXY	pdb2m16
cyp_33C9_2	pdb6amw
SapB3_5	pdb7jyz
I0QYY0_9GAMM	pdb2llf
Bx_tlp_1_5	pdb2ltl
Bx_cpl_3_3	pdb7mzx
BxCYP33D3_3	pdb2kct
BxCYP33C4_5	pdb2lso
A0A1I7SCF8_BURXY	pdb2l0c
Bx_tlp_1_5	pdb2lcg
BxATG16_4	pdb2lso
I0QMH2_9GAMM	pdb6xr7
Bx_tlp_1_4	2kl7
BxATG16_3	pdb2l07
Bx_tlp_1_4	pdb5z55
Bx_cpl_3_4	pdb6j4i
BxCYP33C9_2	pdb8ftx
Bx_tlp_1_3	pdb2ma5
BxSapB1_2	pdb2lni
BxCYP33D3_3	pdb3hbh
Bx_Prx_5	pdb2ksi
BxATG16_4	2kyq
BxCYP33D3_3	pdb2ma5
Bx_cpl_3_3	pdb2l05
BxSapB1_1	pdb2l09
Bx_tlp_1_4	pdb8ftw
BxCYP33C4_5	pdb2lnb
Bx_tlp_1_4	pdb6xr6
I0QYY0_9GAMM	pdb7mzx
Bx_tlp_1_3	pdb6xr7
I0QYY0_9GAMM	pdb2l5q
BxCYP33D3_3	pdb2mry
Bx_tlp_1_3	pdb6kna
A0A1I7SCF8_BURXY	pdb7wcg
Bx_cpl_3_3	pdb2kzw
BxCYP33C9_2	pdb7lu8
Bx_tlp_1_5	pdb2l3f
BxATG16_3	pdb3sdt
BxCYP33C9_2	2kyq
Bx_tlp_1_5	pdb7n99
Bx_tlp_1_3	pdb7qcc
BxCYP33C9_2	pdb7knv
BxCYP33C4_5	pdb2lok
I0QYY0_9GAMM	pdb2kru
A0A1I7SCF8_BURXY	pdb6amv
Bx_tlp_1_3	pdb2lni
I0QMH2_9GAMM	pdb2l9q
cyp_33C9_2	pdb6o6w
Bx_cpl_3_3	pdb2m8x
BxSapB1_1	pdb2lfi
BxCYP33C9_2	pdb2mh2
BxATG9_5	pdb2krt
Bx_cpl_3_4	7mzw
Bx_cpl_3_4	pdb2kpn
cyp_33C9_2	pdb2kw6
BxSapB1_1	pdb2kzx
Bx_tlp_1_3	pdb2m8x
cyp_33C9_1	pdb2m47
A0A1I7RL37_BURXY	pdb3sdr
Bx_Prx_5	pdb2l7q
Bx_cpl_3_4	pdb2l82
Bx_cpl_3_3	pdb6j4i
BxCYP33D3_3	pdb3sae
BxSapB1_1	pdb2kkq
Bx_cpl_2_2	pdb7jyz
A0A1I7RL37_BURXY	pdb6xry
cyp_33C9_1	pdb2ljl
Bx_cpl_3_3	pdb2kzv
cyp_33C9_1	pdb6xr6
Bx_Prx_5	pdb2kru
BxCYP33C4_5	pdb2kz5
BxCYP33C9_2	pdb2kwb
cyp_33C9_1	pdb2l9q
BxCYP33D3_3	pdb2lf2
cyp_33C9_1	pdb2kw2
Bx_tlp_1_3	pdb2n66
Bx_Prx_3	2kcx
BxATG16_3	pdb2lxu
Bx_tlp_1_5	pdb2kt8
BxCYP33D3_3	pdb2l08
Bx_tlp_1_5	pdb6e4j
I0QYY0_9GAMM	pdb2kt8
BxATG16_3	pdb2l9q
cyp_33C9_1	pdb2ltl
I0QYY0_9GAMM	pdb2l07
BxATG16_4	pdb2l09
BxSapB1_1	pdb6nzl
BxATG16_4	pdb2kz5
BxSapB1_2	pdb2kpn
I0QYY0_9GAMM	pdb2lek
A0A1I7RL37_BURXY	pdb7m5t
BxCYP33C9_2	pdb6xr6
A0A1I7RKM9_BURXY	pdb2m16
BxATG16_4	pdb2kwb
Bx_tlp_1_5	pdb6lqz
Bx_Prx_5	pdb8ftw
I0QYY0_9GAMM	pdb2lfi
BxATG16_3	pdb2lso
BxATG16_3	pdb2mh2
BxSapB1_2	pdb7mzx
BxCYP33D3_3	pdb2mh2
Bx_cpl_3_4	pdb2lmd
BxSapB1_1	pdb2kt1
BxCYP33D3_3	pdb2kkq
A0A1I7SCF8_BURXY	pdb2lfi
Bx_cpl_3_4	pdb2ljl
BxSapB1_2	pdb2lze
BxCYP33D3_3	pdb2kpn
Bx_tlp_1_3	pdb2lio
Bx_Prx_3	pdb7jyz
Bx_tlp_1_4	pdb2lok
A0A1I7RL37_BURXY	pdb2loy
BxCYP33D3_3	pdb5vso
BxSapB1_1	pdb7kix
Bx_tlp_1_5	pdb6prp
Bx_cpl_2_3	pdb2mk2
SapB3_3	pdb2l9q
Bx_tlp_1_3	pdb4lej
BxATG16_3	pdb5uke
cyp_33C9_1	pdb6amv
BxSapB1_1	pdb6jxu
Bx_tlp_1_5	pdb7jyz
Bx_cpl_3_4	pdb2n3k
BxATG16_3	pdb6o6w
cyp_33C9_1	pdb6nzl
I0QYY0_9GAMM	pdb6prq
Bx_tlp_1_5	pdb2kwb
cyp_33C9_2	pdb6kna
cyp_33C9_2	pdb3sae
A0A1I7SCF8_BURXY	pdb2kru
Bx_cpl_3_3	pdb2kpm
BxCYP33D3_3	pdb6e4j
cyp_33C9_2	2lla
Bx_tlp_1_4	pdb3sdq
Bx_cpl_3_4	pdb7x5c
BxCYP33D3_3	2kl7
BxSapB1_2	pdb2kd1
I0QYY0_9GAMM	pdb2lio
Bx_Prx_5	pdb2loy
BxCYP33D3_3	pdb2kl3
Bx_Prx_3	pdb2ksh
SapB3_3	pdb6xr6
BxCYP33D3_3	pdb7qcc
I0QYY0_9GAMM	pdb5nce
cyp_33C9_1	pdb2mv0
BxCYP33D3_3	pdb6amv
Bx_cpl_3_4	pdb2luz
I0QYY0_9GAMM	pdb2lak
I0QYY0_9GAMM	pdb2lch
BxSapB1_1	pdb2n75
cyp_33C9_2	pdb2lx7
BxATG16_4	pdb7x5c
BxCYP33D3_3	pdb6pqe
cyp_33C9_1	pdb2kd1
BxATG16_4	pdb2kt7
BxCYP33C9_2	pdb7lns
Bx_cpl_3_4	pdb5uke
BxSapB1_1	pdb7jyn
BxSapB1_1	pdb2m16
Bx_tlp_1_3	pdb6prq
cyp_33C9_1	pdb2lk2
BxATG16_4	pdb6prq
Bx_tlp_1_5	pdb7knv
BxCYP33D3_5	2kyq
A0A1I7SCF8_BURXY	pdb2l09
I0QYY0_9GAMM	pdb3sdq
cyp_33C9_1	pdb5zau
Bx_cpl_3_4	pdb2l3f
A0A1I7RKM9_BURXY	pdb6xr6
cyp_33C9_1	2lla
BxSapB1_2	pdb6prp
Bx_tlp_1_4	pdb6e4j
Bx_cpl_3_4	pdb2lk2
cyp_33C9_2	pdb2ltl
Bx_tlp_1_5	pdb2lnb
Bx_tlp_1_3	pdb6lqz
Bx_tlp_1_4	pdb7mzz
BxSapB1_1	pdb2lw4
BxSapB1_1	pdb8ftx
BxATG16_3	pdb2mm6
Bx_tlp_1_5	pdb7wcg
Bx_cpl_3_3	pdb2n76
Bx_tlp_1_4	pdb2mk2
A0A1I7RKM9_BURXY	2kcx
Bx_tlp_1_4	pdb7qcc
Bx_tlp_1_3	pdb2n76
BxATG16_4	pdb2luz
Bx_cpl_3_4	2kyq
Bx_tlp_1_5	pdb2nbn
cyp_33C9_2	pdb2lfi
Bx_tlp_1_4	pdb2kl3
A0A1I7RL37_BURXY	pdb7mzx
Bx_tlp_1_3	pdb2n75
Bx_Prx_3	pdb2l3f
BxSapB1_2	pdb6xr6
cyp_33C9_1	pdb8ubh
BxSapB1_2	pdb2lw4
Bx_tlp_1_3	pdb2kwb
A0A1I7SCF8_BURXY	pdb2ll8
A0A1I7SCF8_BURXY	pdb5z55
cyp_33C9_1	pdb2n75
I0QMH2_9GAMM	2kcx
A0A1I7SCF8_BURXY	pdb2ma5
BxATG16_3	pdb4lej
A0A1I7SCF8_BURXY	pdb7lu8
BxCYP33C9_1	2kyq
BxATG16_4	pdb2n3k
A0A1I7SCF8_BURXY	pdb2kkq
BxATG16_3	pdb2lze
A0A1I7SCF8_BURXY	pdb2mry
Bx_tlp_1_3	7mzw
Bx_tlp_1_4	pdb2l0d
Bx_Prx_5	pdb7lns
BxCYP33C4_5	pdb7sxb
BxSapB1_1	pdb2lak
cyp_33C9_2	pdb2lek
Bx_tlp_1_3	pdb6o6w
cyp_33C9_1	pdb2kt8
BxCYP33C4_5	pdb6pqe
Bx_tlp_1_3	pdb3sdv
A0A1I7SCF8_BURXY	pdb2n66
I0QYY0_9GAMM	pdb2lnb
Bx_cpl_3_4	pdb5kp0
BxSapB1_2	pdb2lcg
Bx_cpl_3_3	pdb6lqz
BxCYP33D3_3	7mzw
BxATG16_4	pdb2lk2
BxATG16_4	2kcx
BxCYP33C4_5	pdb2n3k
Bx_cpl_3_4	pdb2lek
BxCYP33C4_5	pdb6pri
Bx_tlp_1_5	pdb2lch
BxCYP33C4_5	pdb2l09
BxSapB1_2	pdb2l09
BxATG9_5	pdb7jyn
cyp_33C9_1	pdb2kpn
Bx_tlp_1_3	pdb2kzx
cyp_33C9_2	pdb5vso
BxCYP33D3_3	pdb2mv0
I0QYY0_9GAMM	pdb7knv
Bx_tlp_1_5	pdb2n75
Bx_tlp_1_3	pdb2lv2
Bx_cpl_3_3	pdb3sdu
Bx_Prx_5	pdb2lfi
cyp_33C9_1	pdb2lgh
BxATG16_3	pdb7n99
BxSapB1_2	pdb6pq2
cyp_33C9_2	pdb6pri
BxCYP33C9_1	pdb2m16
cyp_33C9_2	pdb5uke
Bx_cpl_3_4	pdb2ljw
BxCYP33D3_3	pdb2lze
BxSapB1_2	pdb6amv
A0A1I7SCF8_BURXY	2kl7
Bx_tlp_1_4	pdb6amv
A0A1I7SCF8_BURXY	pdb3sdq
Bx_cpl_3_3	pdb2kkq
Bx_tlp_1_3	pdb2m16
SapB3_5	pdb8ubh
Bx_cpl_3_4	pdb6xr7
Bx_cpl_3_4	pdb2kru
BxATG9_5	2kl7
BxSapB1_2	pdb2kl6
Bx_cpl_3_3	pdb7kix
cyp_33C9_2	pdb2kpt
Bx_cpl_3_3	pdb2nbn
A0A1I7SCF8_BURXY	pdb2lnb
BxCYP33C4_5	pdb2lf2
I0QMH2_9GAMM	pdb2kt1
BxSapB1_2	pdb2kkq
Bx_tlp_1_3	pdb2l9p
Bx_tlp_1_5	pdb7m5t
BxATG16_3	pdb8ftw
BxCYP33C4_5	pdb2mm6
BxCYP33D3_3	pdb2l0a
I0QYY0_9GAMM	pdb2l0c
BxSapB1_2	pdb2ljw
Bx_tlp_1_3	pdb2lmd
Bx_tlp_1_5	pdb6xrg
Bx_cpl_3_4	pdb5ks6
BxATG16_3	pdb5nce
BxATG16_3	pdb2n3k
BxATG16_4	pdb6cgh
cyp_33C9_2	pdb5nce
BxSapB1_1	pdb6kna
cyp_33C9_2	pdb2n75
BxSapB1_2	pdb2lgh
cyp_33C9_2	pdb2l9q
Bx_tlp_1_3	pdb2kzv
cyp_33C9_2	2kyq
SapB3_5	pdb6xrg
Bx_Prx_3	2kl7
A0A1I7SCF8_BURXY	pdb2lw4
BxATG16_4	pdb2mbm
Bx_tlp_1_4	pdb2lcg
BxSapB1_2	pdb6xry
A0A1I7RL37_BURXY	pdb2l05
I0QYY0_9GAMM	pdb2m47
cyp_33C9_5	pdb6xry
BxCYP33D3_3	pdb2n75
Bx_tlp_1_4	pdb7wcg
Bx_cpl_3_4	pdb7mzz
A0A1I7SCF8_BURXY	pdb2ltl
Bx_cpl_3_4	pdb8ftx
Bx_cpl_3_3	pdb2ljw
Bx_tlp_1_5	pdb2kl6
Bx_cpl_3_4	pdb2l08
BxCYP33D3_3	pdb2kim
SapB3_5	pdb6xr7
I0QYY0_9GAMM	pdb2ma6
Bx_tlp_1_5	pdb2ksh
BxCYP33C9_2	2lla
Bx_Prx_3	pdb6xr6
A0A1I7SCF8_BURXY	pdb2l08
BxSapB1_1	pdb7jyz
cyp_33C9_1	pdb2l5q
A0A1I7SCF8_BURXY	pdb2lso
BxATG16_3	pdb2lni
BxATG16_4	pdb6xr6
Bx_tlp_1_4	pdb5krw
cyp_33C9_1	pdb7lns
BxSapB1_1	pdb2ksi
cyp_33C9_1	pdb7m5t
Bx_tlp_1_4	pdb2lnb
Bx_cpl_3_1	pdb7jyn
cyp_33C9_1	pdb2mbl
BxCYP33C9_2	pdb2mk2
BxSapB1_2	pdb2kt7
A0A1I7RL37_BURXY	pdb2kw2
BxSapB1_1	7mzw
Bx_Prx_3	pdb7jyn
A0A1I7RKM9_BURXY	pdb6xr7
BxCYP33D3_3	pdb6jxu
Bx_cpl_3_3	pdb7lns
cyp_33C9_1	pdb2mm5
cyp_33C9_1	pdb6lqz
I0QYY0_9GAMM	pdb2lok
Bx_tlp_1_4	pdb7mzx
I0QYY0_9GAMM	pdb8ftw
BxCYP33D3_3	pdb3sdv
Bx_cpl_3_3	2kyq
Bx_tlp_1_5	pdb2n66
BxATG16_4	pdb7m5t
Bx_tlp_1_5	pdb2lak
cyp_33C9_1	pdb2n76
cyp_33C9_2	pdb7wcg
BxCYP33D3_3	pdb7lns
Bx_cpl_3_3	pdb2lk2
cyp_33C9_1	pdb3sdv
BxSapB1_1	pdb5krw
BxCYP33C4_5	pdb7mzx
Bx_tlp_1_5	2lla
Bx_tlp_1_4	pdb6jxu
Bx_tlp_1_4	pdb2ljw
BxATG16_3	pdb7sxb
I0QYY0_9GAMM	pdb3sdu
Bx_tlp_1_4	pdb2ltl
Bx_tlp_1_3	pdb2lx7
cyp_33C9_1	pdb5vso
Bx_tlp_1_4	pdb2mbl
BxATG16_3	pdb2lw4
Bx_cpl_2_5	pdb2mk2
BxCYP33C9_1	pdb7jyz
Bx_cpl_3_4	pdb6jxw
BxSapB1_1	pdb2lml
Bx_tlp_1_3	pdb7wcg
BxSapB1_1	pdb2llf
cyp_33C9_5	pdb6xr7
BxATG16_4	pdb2lq3
SapB3_3	pdb6xr7
Bx_tlp_1_4	pdb5nce
Bx_cpl_3_3	pdb8ftx
BxCYP33C4_5	pdb7wcg
BxCYP33C4_5	pdb2kd1
cyp_33C9_2	pdb6prq
SapB3_3	pdb7kix
BxATG9_5	pdb2l3f
BxCYP33C4_5	pdb3hbe
Bx_tlp_1_4	7mzw
Bx_cpl_3_3	pdb2loy
I0QYY0_9GAMM	2lla
Bx_tlp_1_3	pdb3sdt
Bx_tlp_1_4	pdb2kzx
BxATG16_4	pdb2mbl
BxSapB1_1	pdb6pqm
Bx_cpl_3_4	pdb6pq2
Bx_Prx_5	pdb7lu8
BxCYP33C9_2	pdb2krt
Bx_cpl_3_4	pdb6prj
Bx_tlp_1_4	pdb2mh2
Bx_cpl_3_3	pdb2ksh
BxSapB1_2	pdb2l05
BxCYP33D3_5	2kcx
Bx_tlp_1_5	pdb2l0d
BxATG16_3	7mzw
A0A1I7SCF8_BURXY	pdb2lf2
Bx_Prx_5	pdb2lnu
cyp_33C9_1	pdb2ll8
A0A1I7SCF8_BURXY	pdb2kz5
Bx_tlp_1_4	pdb2l5q
I0QYY0_9GAMM	pdb5ks6
BxSapB1_2	pdb6pri
BxATG16_4	pdb2ljw
I0QYY0_9GAMM	pdb2n76
BxCYP33D3_3	pdb7mzz
cyp_33C9_2	pdb2kkq
cyp_33C9_2	pdb2kw2
BxATG16_4	pdb2ksh
Bx_tlp_1_3	pdb2mbl
BxCYP33C9_2	pdb2lcg
BxCYP33C4_5	pdb6nu4
BxCYP33D3_3	pdb6prq
Bx_tlp_1_5	pdb2mm5
BxSapB1_2	pdb5ks6
BxATG16_3	pdb2l0a
BxATG16_4	pdb2lze
cyp_33C9_2	pdb2kpn
BxCYP33C4_5	pdb6xry
Bx_cpl_3_4	pdb2kkq
BxATG16_4	pdb2kl6
BxCYP33C4_5	pdb6prj
BxATG16_4	pdb2ma5
A0A1I7SCF8_BURXY	pdb6amw
cyp_33C9_1	pdb2lq3
cyp_33C9_2	pdb6ppt
Bx_tlp_1_4	pdb2ma5
Bx_tlp_1_4	pdb6o6w
A0A1I7RL37_BURXY	pdb2l5q
BxATG16_4	pdb6jxw
A0A1I7RKM9_BURXY	pdb7jyn
Bx_tlp_1_4	pdb2l05
A0A1I7SCF8_BURXY	pdb6xr6
I0QYY0_9GAMM	pdb6nu4
BxCYP33C4_5	pdb3sdq
A0A1I7RL37_BURXY	pdb2lnu
BxATG16_3	pdb2l8v
cyp_33C9_1	pdb7jyz
BxCYP33D3_3	pdb7n99
Bx_tlp_1_5	pdb2lw4
BxCYP33C4_5	pdb6amw
BxCYP33D3_3	pdb2kzw
I0QYY0_9GAMM	pdb7jyn
Bx_cpl_3_4	pdb7mzx
Bx_tlp_1_4	pdb2ljl
I0QYY0_9GAMM	pdb2l0a
BxSapB1_2	pdb2lio
A0A1I7SCF8_BURXY	pdb2lze
Bx_Prx_5	pdb2kt1
BxATG16_3	pdb6j4i
BxCYP33D3_3	pdb2kvo
BxATG16_4	pdb4lej
BxSapB1_1	pdb2m8x
Bx_tlp_1_3	pdb2ltl
I0QYY0_9GAMM	pdb2m01
BxATG16_3	pdb2lgh
Bx_tlp_1_4	pdb7sxb
BxATG16_4	pdb7wcg
Bx_tlp_1_3	pdb2l05
cyp_33C9_2	pdb2mh2
Bx_Prx_5	2kcx
BxSapB1_1	pdb5nce
BxCYP33C4_5	pdb2nbn
BxATG9_5	pdb6xr7
cyp_33C9_1	pdb6o6w
BxCYP33D3_3	pdb3hbd
I0QYY0_9GAMM	pdb2lx7
SapB3_3	pdb8ftx
A0A1I7SCF8_BURXY	pdb2kw6
BxATG16_4	pdb2lw4
cyp_33C9_1	pdb7mzz
Bx_cpl_3_3	pdb2l3f
A0A1I7RL37_BURXY	pdb2l7q
Bx_tlp_1_5	pdb2kim
BxATG16_3	pdb5vso
BxATG16_4	pdb2ll8
BxATG16_3	pdb2n69
BxATG16_3	2lla
Bx_cpl_2_2	pdb6xrg
BxSapB1_1	pdb2l3f
Bx_Prx_5	pdb2lf2
Bx_cpl_3_4	pdb2l09
cyp_33C9_1	pdb2lni
Bx_Prx_5	pdb2kt8
BxSapB1_1	pdb2lnb
Bx_Prx_5	pdb3sdt
BxCYP33C4_5	pdb5z55
BxSapB1_1	pdb2lf2
BxATG16_3	pdb2kim
BxCYP33D3_3	pdb2kif
Bx_tlp_1_5	pdb6xr6
Bx_cpl_3_1	pdb7jyz
cyp_33C9_1	pdb2lnb
BxCYP33C4_5	2kyq
BxCYP33D3_3	pdb2mm5
BxATG16_4	pdb2l3f
cyp_33C9_2	pdb2kt1
cyp_33C9_1	pdb2lmd
Bx_tlp_1_5	pdb2lna
A0A1I7SCF8_BURXY	pdb2kpn
cyp_33C9_1	pdb2mbm
BxCYP33C4_5	2kcx
I0QYY0_9GAMM	pdb2krt
BxCYP33D3_3	pdb2ksh
Bx_tlp_1_3	pdb8ftw
SapB3_5	2kyq
BxCYP33C4_5	pdb2lna
BxATG16_4	pdb2kif
Bx_tlp_1_4	pdb2loy
Bx_tlp_1_3	pdb5ks6
cyp_33C9_1	pdb6pq2
A0A1I7RKM9_BURXY	pdb2ksi
BxATG16_3	pdb2lml
BxSapB1_2	pdb2lk2
BxATG16_4	pdb2l8v
BxATG9_5	2lla
A0A1I7RL37_BURXY	pdb2l07
Bx_cpl_3_3	pdb7n99
A0A1I7RL37_BURXY	pdb6kna
Bx_tlp_1_5	pdb2kzx
BxSapB1_1	pdb2kzw
cyp_33C9_2	pdb2ksh
BxSapB1_1	pdb2l8v
BxCYP33C4_5	pdb6cgh
Bx_Prx_5	pdb2lcg
cyp_33C9_1	pdb6nu4
I0QYY0_9GAMM	pdb2n75
Bx_cpl_2_4	pdb6xrg
Bx_cpl_2_3	2kcx
BxCYP33C9_2	pdb2ksh
BxSapB1_1	pdb2krt
BxSapB1_1	pdb2m47
Bx_tlp_1_3	pdb7kix
A0A1I7SCF8_BURXY	pdb2krt
cyp_33C9_1	pdb2mh2
Bx_Prx_5	pdb2kz5
Bx_tlp_1_4	2kyq
cyp_33C9_3	2kcx
Bx_Prx_5	pdb2kt7
Bx_tlp_1_3	pdb5vso
BxSapB1_1	pdb2kim
cyp_33C9_1	pdb6xrg
Bx_cpl_3_4	pdb2l8v
Bx_cpl_3_3	pdb2l9q
BxSapB1_1	pdb2ljw
I0QYY0_9GAMM	pdb6amv
Bx_tlp_1_3	pdb2lml
Bx_cpl_3_3	pdb6e4j
BxCYP33C4_5	pdb2l7q
cyp_33C9_2	pdb2kt7
BxSapB1_1	pdb2lch
cyp_33C9_1	pdb2l8v
Bx_cpl_3_4	pdb2l0a
BxATG16_4	pdb2lfi
Bx_tlp_1_4	pdb3sae
A0A1I7RKM9_BURXY	pdb2l07
BxSapB1_1	pdb3hbe
Bx_tlp_1_4	pdb2ll8
Bx_tlp_1_5	pdb2mh2
A0A1I7SCF8_BURXY	pdb5uke
Bx_Prx_5	pdb6amv
Bx_tlp_1_4	pdb5zau
Bx_cpl_3_3	pdb2l0a
I0QMH2_9GAMM	pdb6xrg
Bx_tlp_1_4	pdb2llf
A0A1I7RL37_BURXY	pdb7qcb
BxSapB1_1	pdb2m01
Bx_tlp_1_3	pdb2mh2
Bx_tlp_1_5	pdb6j4i
BxATG16_4	pdb7sxb
Bx_tlp_1_5	pdb2kw6
BxSapB1_1	pdb2mbl
Bx_tlp_1_5	pdb2krt
BxATG16_4	pdb7mzz
cyp_33C9_2	pdb2kl6
Bx_cpl_3_3	pdb2l09
cyp_33C9_1	pdb6kna
BxSapB1_2	pdb2kt8
BxATG16_4	pdb5z55
Bx_cpl_3_3	pdb5nce
Bx_cpl_3_3	pdb2mk2
A0A1I7SCF8_BURXY	pdb2mm5
I0QYY0_9GAMM	pdb2kpn
I0QYY0_9GAMM	pdb7m5t
Bx_cpl_3_4	pdb2mbm
cyp_33C9_2	pdb2lw4
BxSapB1_2	pdb5nce
BxCYP33D3_3	pdb8ftw
I0QMH2_9GAMM	pdb7kix
BxCYP33C4_5	pdb2lni
Bx_tlp_1_5	pdb2lze
BxSapB1_1	pdb2mv0
Bx_tlp_1_4	pdb2kpt
Bx_cpl_3_3	pdb2l0d
cyp_33C9_1	pdb3sae
BxSapB1_1	pdb2lk2
Bx_cpl_3_4	pdb5z55
BxCYP33C4_5	pdb2m16
A0A1I7SCF8_BURXY	pdb2ljw
Bx_tlp_1_3	pdb2n69
Bx_tlp_1_5	pdb5nce
I0QYY0_9GAMM	pdb2l82
BxSapB1_1	pdb2kd1
A0A1I7SCF8_BURXY	pdb2lk2
BxSapB1_1	pdb6pqe
A0A1I7SCF8_BURXY	pdb2n75
Bx_tlp_1_5	pdb2lfi
Bx_tlp_1_4	pdb2kru
BxATG16_4	pdb2lni
BxCYP33C4_5	pdb2l8v
cyp_33C9_1	pdb2l0d
cyp_33C9_1	pdb5kp0
I0QYY0_9GAMM	pdb2l7q
SapB3_5	pdb2ksh
Bx_cpl_2_5	2kyq
Bx_tlp_1_5	pdb3sdr
BxATG16_4	pdb6ppt
Bx_tlp_1_3	pdb2lnu
cyp_33C9_2	pdb6prj
I0QYY0_9GAMM	pdb6cgh
BxATG16_3	pdb6xr6
I0QYY0_9GAMM	pdb7jyz
Bx_tlp_1_3	pdb2ljl
cyp_33C9_2	pdb2lk2
cyp_33C9_1	pdb6pqe
Bx_Prx_5	pdb2lok
BxATG16_3	pdb6cgh
Bx_tlp_1_5	pdb2mk2
Bx_tlp_1_4	pdb2m8x
Bx_tlp_1_4	pdb7kix
I0QYY0_9GAMM	pdb2lze
Bx_tlp_1_5	2kl7
BxCYP33C4_5	pdb2l0c
BxATG16_4	pdb6xrg
I0QMH2_9GAMM	pdb2l3f
BxCYP33D3_3	pdb6pq2
BxCYP33C9_1	2kcx
BxCYP33D3_3	pdb7jyz
BxATG16_3	pdb7jyz
Bx_cpl_3_4	pdb7qcc
cyp_33C9_1	pdb2lcg
Bx_tlp_1_3	pdb2kd1
BxSapB1_2	pdb2l5q
Bx_cpl_3_3	pdb2mry
Bx_tlp_1_5	pdb2ljl
Bx_Prx_3	pdb7kix
Bx_tlp_1_4	pdb2kpn
cyp_33C9_1	pdb2lv2
BxSapB1_1	pdb6j4i
cyp_33C9_2	pdb6xrg
Bx_tlp_1_5	pdb2lml
BxCYP33D3_3	pdb2ma6
BxCYP33C4_5	pdb2lio
A0A1I7SCF8_BURXY	2kcx
Bx_cpl_3_4	pdb2lnu
cyp_33C9_2	pdb7lu8
BxSapB1_1	pdb2lmd
cyp_33C9_2	pdb2kzv
BxATG16_4	pdb2kw6
BxSapB1_1	pdb2kt8
Bx_tlp_1_3	pdb2kim
BxCYP33C4_5	pdb2m01
BxATG16_4	pdb2n75
Bx_tlp_1_3	pdb2l07
SapB3_5	pdb7jyn
BxATG16_3	pdb2kl3
A0A1I7SCF8_BURXY	2kyq
BxATG16_4	pdb5krw
cyp_33C9_2	pdb8ftx
BxSapB1_1	pdb2l0d
Bx_Prx_5	pdb2mh2
Bx_tlp_1_3	pdb2kru
Bx_cpl_3_3	pdb2mbm
BxATG9_5	pdb2mk2
BxCYP33D3_3	pdb8ftx
BxATG16_3	pdb7mzz
Bx_tlp_1_5	pdb2kkq
Bx_Prx_5	pdb2lze
Bx_Prx_5	pdb6pqe
BxCYP33D3_3	2kcx
Bx_cpl_3_3	pdb2l82
Bx_tlp_1_3	pdb7sxb
Bx_tlp_1_5	pdb6o6w
Bx_Prx_3	pdb2kt1
Bx_cpl_3_1	pdb2mk2
BxCYP33C9_1	pdb6xr6
Bx_cpl_2_3	pdb6xrg
cyp_33C9_2	pdb4lej
cyp_33C9_1	pdb2lw4
BxCYP33C4_5	pdb2kzx
Bx_tlp_1_5	pdb2kpt
Bx_tlp_1_3	pdb2m01
Bx_tlp_1_4	pdb6pq2
BxATG16_4	pdb2lch
BxCYP33C9_1	pdb6xry
cyp_33C9_1	pdb2ma5
BxCYP33D3_3	pdb2kl6
SapB3_5	pdb2l07
Bx_Prx_5	7mzw
cyp_33C9_1	pdb7jyn
BxATG9_5	pdb2m16
BxCYP33C4_5	pdb7lns
Bx_cpl_2_3	pdb7jyn
BxSapB1_2	pdb2lx7
BxCYP33C9_2	pdb7m5t
Bx_tlp_1_3	pdb6ppt
I0QYY0_9GAMM	pdb2m16
Bx_Prx_5	pdb7mzx
BxATG16_4	pdb3sdr
Bx_tlp_1_3	pdb6prj
cyp_33C9_1	pdb6amw
I0QYY0_9GAMM	pdb6amw
BxCYP33C4_3	pdb7jyz
cyp_33C9_1	pdb2lok
BxSapB1_2	pdb6pqe
Bx_cpl_3_3	pdb2lze
I0QYY0_9GAMM	pdb6ppt
SapB3_3	pdb2l07
BxCYP33C9_2	pdb2kru
A0A1I7SCF8_BURXY	pdb2m8x
Bx_Prx_5	pdb6pri
I0QYY0_9GAMM	pdb6xry
BxCYP33C4_5	pdb6xr7
Bx_cpl_3_4	pdb2kl3
BxATG16_3	pdb7lu8
SapB3_5	pdb2kru
I0QYY0_9GAMM	pdb2l3f
BxSapB1_1	pdb2loy
Bx_cpl_3_4	pdb3sdu
cyp_33C9_1	pdb2l08
BxATG16_3	pdb6pqm
BxATG16_4	pdb6lqz
BxCYP33C4_5	pdb2llf
BxCYP33D3_3	pdb5z55
BxATG16_3	pdb2kkq
A0A1I7SCF8_BURXY	pdb3sdu
BxCYP33D3_5	pdb2mk2
Bx_cpl_3_4	pdb6lqz
Bx_cpl_3_4	pdb2kzx
BxATG16_3	pdb2lcg
Bx_Prx_3	pdb2l07
Bx_Prx_5	2kyq
SapB3_3	pdb7jyn
A0A1I7SCF8_BURXY	pdb2mm6
BxCYP33C4_5	pdb2l08
BxATG16_3	pdb2kpn
Bx_cpl_3_3	pdb2kim
cyp_33C9_1	pdb8ftw
I0QYY0_9GAMM	pdb5vso
BxSapB1_2	pdb2lch
BxCYP33C4_5	pdb2kif
Bx_tlp_1_5	pdb6prq
I0QYY0_9GAMM	pdb2mm5
BxSapB1_1	pdb7lns
BxATG16_4	pdb2mv0
Bx_cpl_3_3	pdb5uke
Bx_tlp_1_3	pdb6jxu
Bx_cpl_3_1	pdb6xry
BxCYP33D3_3	pdb2lcg
A0A1I7RL37_BURXY	pdb2ksi
cyp_33C9_1	pdb2luz
I0QYY0_9GAMM	pdb2lso
BxATG16_3	pdb2lmd
SapB3_5	2kcx
Bx_cpl_3_3	pdb2mm6
BxATG16_3	pdb3sdq
A0A1I7SCF8_BURXY	pdb2loy
SapB3_5	pdb2krt
Bx_Prx_5	pdb8ubh
Bx_tlp_1_3	pdb2krt
Bx_tlp_1_4	pdb2kt1
BxCYP33C4_5	pdb3sdr
Bx_tlp_1_3	pdb6nzl
I0QYY0_9GAMM	pdb5zau
BxATG16_3	pdb2kw6
A0A1I7SCF8_BURXY	pdb2l9q
Bx_cpl_3_3	pdb7jyn
Bx_cpl_3_3	pdb3hbd
A0A1I7RKM9_BURXY	pdb2mk2
Bx_cpl_3_4	pdb2l9q
BxCYP33C9_2	pdb2ksi
BxCYP33D3_3	pdb2lso
BxSapB1_1	pdb6lqz
Bx_cpl_3_3	pdb2ma5
BxSapB1_2	pdb2l9q
cyp_33C9_1	pdb2lek
BxSapB1_1	pdb6xry
BxATG16_4	pdb2kl3
Bx_cpl_3_4	pdb2lcg
BxSapB1_2	pdb7m5t
BxATG16_4	pdb5uke
Bx_cpl_3_4	pdb3sdv
I0QYY0_9GAMM	pdb6jxw
cyp_33C9_1	pdb4lej
BxSapB1_2	pdb2kl3
BxATG16_4	pdb2l82
Bx_cpl_3_3	pdb2lw4
BxCYP33C4_5	pdb2lk2
cyp_33C9_2	pdb3sdt
BxCYP33D3_3	pdb2lio
BxATG16_3	pdb6pqe
cyp_33C9_2	pdb2llf
A0A1I7SCF8_BURXY	pdb2kl3
Bx_cpl_3_4	pdb5zau
cyp_33C9_2	2kl7
BxSapB1_1	pdb5zau
Bx_tlp_1_3	pdb7mzx
Bx_tlp_1_4	2lla
A0A1I7RL37_BURXY	pdb2lok
I0QMH2_9GAMM	pdb6xr6
Bx_tlp_1_5	pdb2n3k
Bx_tlp_1_4	pdb2kzv
Bx_tlp_1_4	pdb2kvo
BxATG16_3	pdb2lio
Bx_cpl_3_4	pdb2kwb
BxSapB1_1	pdb6nu4
cyp_33C9_1	pdb2m16
Bx_tlp_1_5	pdb2kvo
BxCYP33C4_5	pdb2lnu
BxCYP33C4_5	pdb2lq3
Bx_cpl_3_1	2kcx
Bx_tlp_1_3	pdb2kt1
I0QMH2_9GAMM	pdb2mh2
I0QYY0_9GAMM	pdb6j4i
BxATG16_3	pdb7jyn
cyp_33C9_2	pdb2l07
Bx_cpl_3_4	pdb7jyn
BxCYP33C4_5	pdb2l5q
BxSapB1_2	pdb2ljl
BxATG16_3	pdb6nu4
BxCYP33C4_5	pdb2lmd
BxSapB1_2	pdb2ksh
cyp_33C9_2	pdb2kru
BxATG16_4	pdb2l07
Bx_cpl_3_4	pdb2m47
cyp_33C9_1	pdb2kl6
cyp_33C9_1	pdb6j4i
BxSapB1_1	2kl7
I0QYY0_9GAMM	pdb2lna
Bx_tlp_1_5	pdb2ll8
BxSapB1_2	pdb7n99
I0QYY0_9GAMM	pdb6xr6
I0QYY0_9GAMM	pdb2m8x
BxCYP33C4_5	pdb2mv0
A0A1I7SCF8_BURXY	pdb2kzv
BxCYP33D3_3	pdb2kt1
A0A1I7RL37_BURXY	pdb2kt1
BxSapB1_2	pdb2kct
cyp_33C9_2	pdb2lio
Bx_tlp_1_5	pdb4lej
cyp_33C9_1	pdb2lak
Bx_cpl_3_4	pdb7jyz
Bx_tlp_1_5	pdb2kzv
BxSapB1_2	pdb6jxw
BxCYP33D3_3	pdb2kz5
Bx_cpl_3_4	pdb2llf
BxCYP33C4_5	pdb5nce
A0A1I7RKM9_BURXY	2kl7
Bx_cpl_3_4	pdb2kzw
Bx_cpl_3_3	pdb2n66
BxATG16_4	pdb2l05
Bx_Prx_5	2kl7
Bx_Prx_5	pdb2m16
BxATG16_3	pdb2kw2
cyp_33C9_2	pdb6pqe
Bx_cpl_3_3	pdb7qcb
cyp_33C9_2	pdb2kd1
Bx_tlp_1_4	pdb2l3f
A0A1I7SCF8_BURXY	pdb6pqm
Bx_Prx_3	pdb2mk2
Bx_tlp_1_3	pdb6xrg
I0QYY0_9GAMM	pdb8ubh
Bx_cpl_3_3	pdb2lcg
BxCYP33C4_5	pdb7knv
Bx_cpl_1_5	2kcx
A0A1I7SCF8_BURXY	pdb5krw
BxSapB1_1	pdb7n99
BxATG16_3	pdb2kif
BxSapB1_2	pdb8ftw
cyp_33C9_2	pdb2l9p
cyp_33C9_1	pdb2lx7
Bx_tlp_1_5	pdb6cgh
Bx_cpl_3_4	pdb7qcb
Bx_cpl_2_5	pdb8ubh
BxSapB1_1	pdb2lso
BxSapB1_1	pdb6xrg
BxSapB1_1	pdb5kp0
Bx_cpl_3_4	pdb2mm6
BxCYP33D3_3	pdb6j4i
BxSapB1_1	pdb2kif
A0A1I7RL37_BURXY	pdb7knv
BxATG16_3	pdb6lqz
Bx_tlp_1_3	pdb2l09
A0A1I7SCF8_BURXY	pdb7n99
Bx_tlp_1_5	pdb2llf
Bx_cpl_3_4	pdb2kct
Bx_cpl_3_3	pdb3hbh
Bx_tlp_1_3	pdb2lak
Bx_tlp_1_5	pdb8ftx
Bx_Prx_3	pdb2krt
BxCYP33C9_2	pdb2lnu
I0QYY0_9GAMM	pdb7kix
Bx_cpl_3_4	pdb2ll8
Bx_cpl_3_3	pdb6prj
Bx_tlp_1_4	pdb2kw6
Bx_cpl_2_5	pdb6xrg
I0QYY0_9GAMM	pdb2ksi
BxATG16_4	pdb2lnb
BxCYP33D3_5	pdb7jyz
cyp_33C9_2	pdb7jyn
Bx_Prx_5	pdb2kif
BxCYP33C4_5	pdb2l3f
I0QYY0_9GAMM	pdb2kif
Bx_tlp_1_5	pdb2kru
Bx_tlp_1_5	pdb5uke
Bx_tlp_1_5	pdb2lgh
BxCYP33D3_3	pdb6ppt
cyp_33C9_1	pdb7lu8
Bx_cpl_3_3	pdb5vso
Bx_tlp_1_3	pdb2l08
cyp_33C9_5	2kcx
cyp_33C9_2	pdb6cgh
Bx_tlp_1_3	pdb2lch
A0A1I7SCF8_BURXY	pdb2mv0
BxATG16_4	pdb2lf2
Bx_cpl_3_4	pdb2n69
cyp_33C9_2	pdb2kzx
Bx_tlp_1_4	pdb2l08
BxCYP33D3_3	pdb2kzx
BxATG16_4	pdb2lak
SapB3_5	pdb2l3f
BxCYP33D3_3	pdb2mbm
Bx_tlp_1_4	pdb7lns
cyp_33C9_2	pdb8ubh
I0QYY0_9GAMM	pdb3sae
BxSapB1_1	pdb2ljl
A0A1I7SCF8_BURXY	pdb2kzw
cyp_33C9_1	pdb2l82
BxATG16_4	pdb6xr7
BxSapB1_1	pdb6prq
cyp_33C9_1	pdb6prp
BxATG16_3	pdb2lnu
BxSapB1_2	pdb2l07
Bx_tlp_1_3	pdb6e4j
Bx_tlp_1_5	pdb6xr7
Bx_tlp_1_4	pdb3hbh
A0A1I7SCF8_BURXY	pdb7jyz
BxSapB1_2	pdb2lxu
Bx_cpl_3_3	pdb6jxu
Bx_cpl_3_3	pdb2kw2
BxCYP33C4_5	pdb6o6w
cyp_33C9_2	pdb2lv2
Bx_tlp_1_5	pdb2l07
BxATG16_3	pdb5krw
Bx_Prx_5	pdb2kpt
Bx_tlp_1_5	pdb2kct
Bx_tlp_1_5	pdb3sae
BxCYP33C4_5	pdb2lcg
BxCYP33C4_5	pdb5uke
I0QYY0_9GAMM	pdb2kzw
BxSapB1_1	pdb2ma5
Bx_tlp_1_4	pdb6pqe
BxCYP33D3_3	pdb2mk2
Bx_tlp_1_3	pdb2l82
BxCYP33D3_3	pdb2m47
cyp_33C9_1	pdb2lf2
SapB3_3	pdb2kt1
Bx_tlp_1_4	pdb2kwb
Bx_cpl_3_1	pdb6xr7
Bx_cpl_3_3	pdb2n3k
A0A1I7RKM9_BURXY	pdb6xrg
BxCYP33D3_3	pdb2lak
BxSapB1_1	2lla
Bx_tlp_1_3	pdb2kz5
cyp_33C9_2	pdb2lak
BxSapB1_2	pdb5zau
I0QYY0_9GAMM	pdb2mh2
BxCYP33C4_5	pdb2kt1
Bx_cpl_3_3	pdb4lej
BxSapB1_2	pdb2kpt
Bx_tlp_1_3	pdb2ll8
Bx_tlp_1_3	pdb3sdu
BxATG16_4	pdb2kvo
Bx_cpl_3_3	2kcx
cyp_33C9_2	pdb5ks6
BxCYP33D3_3	pdb2l9q
BxCYP33C4_5	pdb6pqm
Bx_tlp_1_5	pdb6amv
Bx_cpl_3_4	pdb2kif
BxCYP33D3_3	pdb2lek
BxCYP33D3_3	pdb2n66
Bx_tlp_1_5	pdb7kix
BxCYP33C4_5	pdb2loy
Bx_Prx_5	pdb7knv
Bx_cpl_3_3	pdb7qcc
BxCYP33D3_3	pdb6amw
Bx_tlp_1_5	pdb7qcc
BxCYP33C4_5	pdb5kp0
I0QYY0_9GAMM	pdb6o6w
BxATG16_4	pdb2mry
A0A1I7RL37_BURXY	pdb8ftw
BxCYP33C9_2	pdb2l07
Bx_cpl_3_4	pdb6prp
Bx_tlp_1_4	pdb2nbn
Bx_tlp_1_4	pdb2n69
Bx_cpl_3_3	pdb2kw6
BxSapB1_2	pdb2kw2
BxSapB1_1	2kyq
BxATG16_4	pdb2kzw
BxCYP33C4_5	pdb7x5c
cyp_33C9_2	pdb2ma5
BxSapB1_1	pdb2lek
BxCYP33C9_2	pdb2kt1
cyp_33C9_1	pdb6prj
Bx_tlp_1_3	pdb2l5q
BxCYP33D3_3	pdb3sdq
Bx_tlp_1_3	pdb7knv
Bx_cpl_3_3	pdb8ftw
Bx_cpl_3_4	pdb2lf2
Bx_cpl_2_5	pdb2m16
I0QYY0_9GAMM	pdb3hbe
cyp_33C9_2	pdb2lna
BxATG16_4	pdb2lmd
cyp_33C9_2	pdb7qcc
BxCYP33C4_5	pdb2n69
Bx_cpl_3_4	pdb6amv
I0QMH2_9GAMM	pdb8ftx
Bx_cpl_3_3	pdb2n69
BxCYP33C9_1	pdb2l07
Bx_cpl_3_3	pdb7m5t
Bx_tlp_1_5	pdb3hbe
BxCYP33D3_3	pdb2m01
A0A1I7SCF8_BURXY	7mzw
Bx_tlp_1_5	pdb2m01
Bx_Prx_5	pdb2kw2
A0A1I7SCF8_BURXY	pdb2lml
BxSapB1_1	pdb6prj
BxATG16_3	pdb3sae
Bx_Prx_5	pdb6cgh
cyp_33C9_2	pdb2lnb
Bx_tlp_1_5	pdb6kna
Bx_cpl_3_4	pdb7lns
Bx_tlp_1_4	pdb6xr7
Bx_tlp_1_4	pdb2mv0
cyp_33C9_2	pdb2m01
Bx_tlp_1_3	pdb2n3k
BxATG16_4	pdb3sae
BxCYP33C9_2	pdb2l5q
Bx_tlp_1_5	pdb2lok
BxSapB1_2	pdb2kt1
Bx_Prx_3	pdb6xry
Bx_tlp_1_5	pdb2l9p
Bx_tlp_1_4	pdb2ma6
cyp_33C9_1	pdb7knv
I0QMH2_9GAMM	2kyq
BxSapB1_1	pdb6e4j
I0QYY0_9GAMM	pdb2lq3
SapB3_3	pdb6xry
Bx_cpl_2_5	2kl7
cyp_33C9_1	pdb7x5c
BxATG16_4	2lla
cyp_33C9_1	pdb6pri
Bx_tlp_1_5	pdb2l82
Bx_tlp_1_3	pdb2lnb
cyp_33C9_2	pdb7kix
BxSapB1_1	pdb2kpm
BxCYP33C4_5	pdb2mh2
BxCYP33D3_3	pdb2lgh
Bx_Prx_5	pdb7jyn
Bx_tlp_1_4	2kcx
BxATG16_3	pdb5zau
Bx_tlp_1_5	pdb2lni
BxCYP33D3_3	pdb2l82
BxSapB1_1	pdb2lok
cyp_33C9_2	pdb6j4i
A0A1I7SCF8_BURXY	pdb2l8v
Bx_Prx_3	pdb6xrg
BxSapB1_1	pdb6amw
Bx_tlp_1_4	pdb3hbe
Bx_tlp_1_4	pdb2lml
I0QYY0_9GAMM	pdb2l05
BxCYP33C4_5	pdb2l9p
BxSapB1_2	2kl7
BxSapB1_1	pdb2lgh
BxATG16_3	pdb6prq
I0QYY0_9GAMM	pdb5z55
Bx_Prx_5	pdb5ks6
BxSapB1_1	pdb2l05
BxATG16_4	pdb7jyz
Bx_Prx_5	pdb7jyz
BxSapB1_2	pdb2kif
Bx_cpl_2_5	pdb2l07
BxATG16_4	pdb2lx7
cyp_33C9_1	pdb2lfi
Bx_tlp_1_4	pdb2lna
I0QYY0_9GAMM	pdb7lns
Bx_cpl_3_4	pdb7knv
Bx_cpl_3_3	pdb2mbl
Bx_tlp_1_3	pdb3hbd
BxSapB1_2	pdb6kna
A0A1I7SCF8_BURXY	pdb6ppt
BxCYP33C4_5	pdb2kt7
A0A1I7SCF8_BURXY	pdb6xr7
cyp_33C9_1	pdb2ljw
Bx_cpl_3_4	pdb2lq3
I0QYY0_9GAMM	pdb2mbl
BxATG16_4	pdb2kw2
BxCYP33D3_3	pdb2lok
I0QYY0_9GAMM	pdb3sdt
Bx_cpl_3_4	pdb2l5q
Bx_tlp_1_4	pdb2lgh
A0A1I7RL37_BURXY	pdb7jyz
cyp_33C9_3	pdb6xr7
cyp_33C9_2	pdb7n99
Bx_Prx_5	pdb3sdu
BxATG16_3	pdb2ll8
BxCYP33D3_3	pdb2m8x
Bx_Prx_5	pdb3sdr
Bx_tlp_1_4	pdb2n75
I0QMH2_9GAMM	pdb8ubh
cyp_33C9_2	pdb2kt8
BxATG16_3	pdb2lnb
BxCYP33D3_3	pdb6nzl
Bx_tlp_1_5	pdb2l5q
cyp_33C9_2	pdb6jxu
I0QMH2_9GAMM	pdb2m16
BxSapB1_1	pdb3sdu
BxATG16_3	pdb6amv
cyp_33C9_1	pdb2mk2
cyp_33C9_2	pdb2lf2
cyp_33C9_2	pdb2nbn
BxCYP33C4_5	pdb6j4i
SapB3_5	pdb2m16
BxSapB1_2	pdb2luz
Bx_tlp_1_4	pdb2l09
cyp_33C9_2	pdb2ljl
cyp_33C9_2	pdb2ljw
Bx_Prx_5	pdb2l07
Bx_tlp_1_3	pdb3hbe
Bx_tlp_1_5	pdb3hbd
I0QYY0_9GAMM	pdb6pq2
BxSapB1_1	pdb2lcg
Bx_cpl_3_4	pdb2lml
Bx_tlp_1_5	pdb7x5c
cyp_33C9_1	pdb3sdu
cyp_33C9_1	pdb2llf
cyp_33C9_1	2kl7
Bx_tlp_1_4	pdb2lq3
BxCYP33C4_5	pdb2l0d
BxATG9_5	pdb6xry
A0A1I7SCF8_BURXY	pdb7m5t
BxCYP33D3_3	pdb2n3k
cyp_33C9_2	pdb2kl3
BxATG16_3	pdb2m01
BxCYP33D3_3	pdb2lfi
BxSapB1_1	pdb2n69
A0A1I7RKM9_BURXY	pdb7kix
Bx_tlp_1_5	pdb2ma6
BxCYP33D3_3	pdb6xr7
BxSapB1_1	pdb2lnu
BxSapB1_2	pdb4lej
Bx_cpl_3_3	pdb2ljl
cyp_33C9_2	pdb2l3f
BxATG16_4	pdb2kkq
A0A1I7RL37_BURXY	pdb2m16
A0A1I7SCF8_BURXY	pdb2kvo
BxATG16_4	pdb6xry
I0QYY0_9GAMM	pdb7mzz
Bx_cpl_3_4	pdb2lni
BxATG16_3	pdb3sdr
cyp_33C9_2	pdb2mm5
A0A1I7SCF8_BURXY	pdb2ma6
Bx_cpl_3_3	pdb2kif
BxATG16_3	pdb6kna
Bx_cpl_3_3	pdb2kpt
BxATG16_4	pdb3sdq
I0QYY0_9GAMM	pdb2nbn
cyp_33C9_2	pdb6pqm
BxATG16_4	pdb5kp0
BxATG16_4	pdb2lok
BxATG16_3	pdb2kt8
cyp_33C9_1	pdb6pqm
cyp_33C9_1	pdb2kru
Bx_cpl_3_3	pdb7jyz
I0QMH2_9GAMM	pdb7jyz
BxSapB1_1	pdb2l07
Bx_cpl_3_4	pdb2nbn
A0A1I7RKM9_BURXY	7mzw
A0A1I7SCF8_BURXY	pdb2mk2
A0A1I7SCF8_BURXY	pdb6kna
BxSapB1_2	pdb2l0c
BxATG16_4	pdb5ks6
Bx_cpl_3_4	pdb2kt8
cyp_33C9_1	pdb2l07
cyp_33C9_2	pdb2lcg
Bx_cpl_3_3	pdb2kwb
Bx_tlp_1_5	pdb2loy
Bx_cpl_3_4	pdb2l05
Bx_tlp_1_3	pdb2kvo
Bx_cpl_3_3	pdb7sxb
A0A1I7SCF8_BURXY	pdb2kzx
BxCYP33C4_5	pdb6amv
A0A1I7RL37_BURXY	2kcx
Bx_cpl_3_4	pdb6pqm
BxCYP33D3_3	pdb2lq3
Bx_Prx_5	pdb7kix
BxCYP33C4_5	pdb2ltl
I0QYY0_9GAMM	pdb7wcg
Bx_cpl_3_4	pdb2l0c
Bx_tlp_1_5	pdb8ubh
cyp_33C9_1	pdb2kt1
I0QYY0_9GAMM	pdb2luz
Bx_cpl_2_4	pdb7jyn
Bx_tlp_1_4	pdb2kkq
BxATG16_3	pdb2loy
BxATG16_3	pdb8ftx
BxSapB1_1	pdb2l9p
Bx_tlp_1_5	pdb3sdv
BxCYP33C4_5	pdb2kkq
BxCYP33C4_5	pdb6xr6
Bx_tlp_1_5	pdb2lq3
BxATG16_4	pdb2kt1
Bx_cpl_3_4	pdb2lok
BxATG16_3	pdb6e4j
Bx_tlp_1_4	pdb2l9p
BxCYP33C4_5	pdb3sae
I0QYY0_9GAMM	pdb3hbh
Bx_cpl_3_4	pdb2ltl
BxCYP33C9_2	pdb8ftw
BxSapB1_2	pdb2llf
Bx_cpl_3_3	pdb2l5q
BxATG16_3	pdb2mv0
A0A1I7SCF8_BURXY	pdb7qcc
A0A1I7SCF8_BURXY	pdb2lok
BxSapB1_2	pdb3hbh
Bx_tlp_1_3	pdb3sdr
SapB3_3	pdb2kwb
BxATG9_5	pdb2kt1
Bx_tlp_1_3	pdb2mm5
BxCYP33C4_5	pdb6lqz
BxCYP33C4_5	pdb2kvo
BxSapB1_1	pdb6pri
A0A1I7SCF8_BURXY	pdb7knv
Bx_tlp_1_5	pdb2ljw
A0A1I7SCF8_BURXY	pdb6xry
Bx_cpl_2_3	2kyq
cyp_33C9_2	pdb6nzl
Bx_tlp_1_4	pdb2lf2
I0QYY0_9GAMM	pdb2lw4
cyp_33C9_1	pdb2n66
Bx_cpl_3_3	pdb2lf2
cyp_33C9_5	2kyq
BxATG16_4	pdb2kt8
BxCYP33C4_5	pdb2ma5
Bx_cpl_3_4	pdb3hbh
BxCYP33D3_3	pdb2n76
BxSapB1_2	pdb2l0a
BxATG16_3	pdb2m47
I0QYY0_9GAMM	pdb6prj
cyp_33C9_1	pdb2kct
Bx_cpl_3_3	pdb7lu8
Bx_tlp_1_4	pdb2lak
BxATG16_3	pdb2lch
Bx_tlp_1_5	pdb3sdt
Bx_cpl_3_3	pdb5zau
cyp_33C9_1	pdb2m8x
BxCYP33D3_3	pdb2ltl
Bx_tlp_1_4	pdb5kp0
I0QYY0_9GAMM	pdb2l09
Bx_tlp_1_3	2kcx
Bx_tlp_1_4	pdb6amw
Bx_cpl_3_4	pdb6e4j
Bx_tlp_1_4	pdb2kl6
BxCYP33D3_3	pdb7jyn
A0A1I7SCF8_BURXY	pdb6nzl
BxATG16_4	pdb2l0c
Bx_tlp_1_5	pdb5vso
BxSapB1_1	pdb3sae
Bx_tlp_1_5	7mzw
Bx_cpl_3_3	pdb2l08
cyp_33C9_2	pdb8ftw
Bx_tlp_1_3	2kyq
A0A1I7SCF8_BURXY	pdb7x5c
BxCYP33D3_3	pdb2kt8
Bx_cpl_3_4	pdb2lze
A0A1I7RKM9_BURXY	2lla
Bx_cpl_3_4	pdb2lna
BxSapB1_1	pdb5z55
A0A1I7SCF8_BURXY	pdb2l0a
A0A1I7SCF8_BURXY	pdb2lni
BxCYP33D3_3	pdb7qcb
Bx_cpl_3_4	pdb4lej
cyp_33C9_2	pdb2lch
Bx_cpl_3_4	pdb2kpt
Bx_tlp_1_5	pdb6pqm
BxATG16_3	pdb7x5c
Bx_cpl_3_3	pdb2lmd
Bx_tlp_1_4	pdb2lze
Bx_tlp_1_3	pdb2kw6
SapB3_3	pdb2kru
Bx_tlp_1_4	pdb3hbd
I0QYY0_9GAMM	pdb7lu8
cyp_33C9_1	pdb2nbn
Bx_tlp_1_3	pdb5zau
Bx_tlp_1_4	pdb2n66
Bx_Prx_5	pdb2l9p
BxSapB1_1	pdb2kw2
Bx_tlp_1_3	pdb2lok
SapB3_5	pdb6xr6
Bx_tlp_1_5	pdb2lk2
BxCYP33C9_2	pdb6xr7
BxATG16_4	2kl7
Bx_cpl_3_3	pdb2l7q
Bx_cpl_3_3	pdb2kz5
BxATG16_3	pdb3hbe
Bx_tlp_1_4	pdb6kna
cyp_33C9_1	2kyq
BxATG16_3	pdb8ubh
BxSapB1_1	pdb3sdt
Bx_tlp_1_5	pdb2kl3
Bx_tlp_1_4	pdb7jyn
Bx_tlp_1_3	pdb2lna
BxCYP33D3_3	pdb2lch
BxCYP33C4_5	pdb2kru
Bx_cpl_3_4	pdb3hbd
cyp_33C9_2	pdb7mzz
cyp_33C9_1	7mzw
BxATG16_4	pdb7jyn
A0A1I7RL37_BURXY	pdb2mk2
Bx_tlp_1_3	pdb2l3f
Bx_cpl_3_3	pdb2lni
Bx_cpl_3_4	pdb2l7q
Bx_cpl_3_3	pdb2lq3
BxATG16_3	pdb2lok
BxSapB1_1	pdb2lx7
I0QYY0_9GAMM	pdb2n69
BxATG16_4	pdb2kpn
Bx_cpl_3_3	pdb6kna
Bx_cpl_3_1	2kyq
Bx_tlp_1_4	pdb6j4i
BxCYP33D3_3	pdb7x5c
Bx_cpl_2_3	pdb7jyz
BxSapB1_1	pdb2lq3
BxSapB1_2	pdb2lv2
cyp_33C9_1	pdb2l9p
BxATG16_3	pdb2kzw
A0A1I7RL37_BURXY	pdb8ftx
BxCYP33D3_3	pdb5zau
Bx_tlp_1_3	pdb2l7q
BxCYP33C4_5	pdb6pq2
BxSapB1_2	pdb2loy
A0A1I7SCF8_BURXY	pdb6xrg
I0QYY0_9GAMM	pdb6pqm
BxCYP33D3_3	pdb3sdu
Bx_Prx_5	pdb6prq
Bx_Prx_5	pdb5zau
A0A1I7RKM9_BURXY	pdb2l3f
Bx_cpl_3_3	pdb6cgh
A0A1I7SCF8_BURXY	pdb6pqe
BxCYP33C4_5	pdb2lgh
Bx_tlp_1_3	pdb2l0c
A0A1I7SCF8_BURXY	pdb2ksh
Bx_tlp_1_5	pdb2lmd
BxCYP33C4_5	pdb2ksh
BxSapB1_1	pdb6ppt
BxCYP33C4_5	pdb2kw6
A0A1I7SCF8_BURXY	pdb6jxw
BxCYP33D3_3	pdb8ubh
cyp_33C9_2	pdb5z55
Bx_tlp_1_4	pdb2kd1
Bx_tlp_1_5	pdb2mry
BxSapB1_1	pdb2lxu
BxSapB1_1	pdb2kz5
Bx_cpl_3_3	pdb3sae
Bx_cpl_3_3	pdb2kl3
BxSapB1_1	pdb2kl6
Bx_tlp_1_3	pdb2mv0
BxCYP33C9_2	pdb2lni
I0QYY0_9GAMM	pdb2mry
BxCYP33D3_3	pdb3sdr
BxATG16_4	pdb6nu4
Bx_cpl_3_3	pdb2lml
cyp_33C9_1	pdb2l3f
BxATG16_3	pdb2ksi
Bx_tlp_1_4	pdb7jyz
Bx_tlp_1_3	pdb5uke
BxSapB1_1	pdb2ll8
BxSapB1_1	pdb2l5q
I0QYY0_9GAMM	pdb2l9q
BxCYP33D3_3	pdb6pri
cyp_33C9_2	pdb2m47
Bx_tlp_1_3	pdb2mbm
BxATG16_4	pdb6jxu
cyp_33C9_2	7mzw
BxCYP33D3_3	pdb6pqm
Bx_tlp_1_3	pdb2lgh
Bx_cpl_3_3	pdb2lxu
A0A1I7SCF8_BURXY	pdb7sxb
cyp_33C9_1	pdb3sdr
BxSapB1_2	pdb2kim
Bx_Prx_5	pdb2l3f
A0A1I7RL37_BURXY	pdb7kix
BxCYP33C4_5	pdb3sdt
I0QMH2_9GAMM	pdb6xry
Bx_cpl_3_3	pdb2kzx
BxATG9_5	7mzw
BxCYP33C4_5	pdb2l82
Bx_tlp_1_4	pdb5vso
BxATG16_3	pdb7lns
Bx_tlp_1_4	pdb6pri
I0QMH2_9GAMM	pdb2ksh
Bx_cpl_2_4	pdb7jyz
Bx_tlp_1_5	pdb2mm6
BxCYP33C4_5	pdb2lch
cyp_33C9_2	pdb2l09
BxATG16_3	pdb2n75
Bx_tlp_1_4	pdb7knv
cyp_33C9_1	pdb2kl3
BxCYP33D3_3	2lla
Bx_tlp_1_4	pdb3sdu
BxATG16_4	pdb8ubh
Bx_tlp_1_5	2kcx
BxATG16_3	pdb7knv
Bx_tlp_1_4	pdb2m16
BxSapB1_2	pdb2kpm
BxCYP33C4_5	pdb7qcb
Bx_cpl_3_4	pdb2kvo
BxATG16_4	pdb2l9p
BxSapB1_2	pdb2l3f
BxATG9_5	pdb8ubh
BxSapB1_1	pdb5uke
BxCYP33D3_3	pdb6xrg
BxATG16_3	pdb2l09
cyp_33C9_2	pdb2mbm
cyp_33C9_1	2kcx
Bx_cpl_3_3	pdb6amv
BxCYP33C4_5	pdb2ma6
I0QYY0_9GAMM	7mzw
A0A1I7RKM9_BURXY	2kyq
BxATG16_4	pdb2n69
BxSapB1_1	pdb2kvo
BxATG16_4	pdb6pri
Bx_cpl_2_2	2kcx
SapB3_5	pdb8ftw
BxCYP33C4_5	pdb6e4j
A0A1I7SCF8_BURXY	pdb3sdv
Bx_cpl_3_3	pdb2lak
Bx_tlp_1_3	pdb2m47
A0A1I7SCF8_BURXY	pdb2lak
BxCYP33C9_2	pdb2m16
cyp_33C9_2	pdb7mzx
BxATG16_3	pdb6xry
A0A1I7SCF8_BURXY	pdb5kp0
BxATG16_3	pdb3sdu
BxCYP33C4_5	pdb3hbh
Bx_cpl_3_4	pdb2ma5
Bx_tlp_1_3	pdb2l8v
I0QYY0_9GAMM	pdb2kt1
cyp_33C9_2	pdb7x5c
BxCYP33D3_3	pdb2kpm
Bx_tlp_1_3	pdb7n99
BxCYP33D3_3	pdb2l9p
Bx_tlp_1_3	2lla
BxSapB1_2	pdb2m01
BxSapB1_1	pdb2l0a
BxSapB1_2	pdb6prj
Bx_cpl_3_4	pdb2krt
BxSapB1_2	pdb2lna
A0A1I7RKM9_BURXY	pdb2ksh
Bx_cpl_3_4	pdb2n76
cyp_33C9_1	pdb2l0a
cyp_33C9_2	pdb6prp
BxCYP33C4_5	2lla
Bx_tlp_1_4	pdb3sdt
cyp_33C9_1	pdb6jxw
BxCYP33C4_5	pdb2lze
Bx_Prx_5	pdb2lch
BxSapB1_1	pdb6prp
Bx_Prx_5	pdb2krt
BxCYP33D3_3	pdb4lej
BxATG16_4	pdb3hbd
BxCYP33C9_2	pdb2l7q
I0QYY0_9GAMM	pdb2kpt
Bx_cpl_3_3	pdb2lso
cyp_33C9_2	pdb7qcb
cyp_33C9_1	pdb7kix
SapB3_3	pdb8ftw
BxSapB1_2	pdb2lnb
BxCYP33D3_3	pdb2ksi
BxATG16_3	pdb2ma6
A0A1I7RL37_BURXY	pdb7lu8
BxSapB1_1	pdb2mm6
BxATG16_4	pdb2kzv
Bx_tlp_1_5	pdb2kt1
Bx_Prx_5	pdb2lni
A0A1I7SCF8_BURXY	pdb2l5q
cyp_33C9_1	pdb7n99
BxCYP33C9_1	pdb7jyn
cyp_33C9_2	pdb2kwb
BxSapB1_1	pdb2lv2
cyp_33C9_1	pdb6xry
BxCYP33D3_3	pdb2kd1
BxCYP33C4_5	pdb7lu8
A0A1I7SCF8_BURXY	2lla
cyp_33C9_1	pdb2l7q
BxCYP33C4_5	pdb2lw4
A0A1I7SCF8_BURXY	pdb3hbe
Bx_tlp_1_3	pdb5z55
BxCYP33C4_5	pdb2lek
BxSapB1_2	pdb8ftx
Bx_cpl_3_4	pdb2l9p
BxATG16_3	pdb2krt
Bx_cpl_3_3	pdb2ma6
Bx_cpl_3_4	pdb6ppt
cyp_33C9_1	pdb2kzv
Bx_tlp_1_5	pdb6prj
I0QYY0_9GAMM	pdb2kim
Bx_Prx_5	pdb8ftx
BxSapB1_1	pdb2kct
Bx_tlp_1_3	pdb2lso
I0QYY0_9GAMM	pdb2kz5
I0QYY0_9GAMM	pdb2mbm
A0A1I7SCF8_BURXY	pdb6j4i
cyp_33C9_4	2kcx
Bx_cpl_3_4	pdb7wcg
A0A1I7SCF8_BURXY	pdb6jxu
BxCYP33C4_5	pdb2mbm
Bx_cpl_3_4	pdb6nu4
Bx_cpl_3_3	2kl7
A0A1I7RL37_BURXY	pdb6xr6
BxCYP33D3_3	pdb2lni
BxSapB1_2	pdb7mzz
A0A1I7SCF8_BURXY	pdb2llf
A0A1I7RL37_BURXY	pdb3sdu
BxSapB1_1	pdb3sdq
Bx_Prx_5	pdb6xrg
BxCYP33C4_3	2kcx
I0QYY0_9GAMM	pdb8ftx
Bx_tlp_1_5	pdb2lx7
Bx_tlp_1_3	pdb2ksh
Bx_tlp_1_3	pdb3hbh
Bx_tlp_1_5	pdb7mzz
I0QYY0_9GAMM	pdb6e4j
Bx_cpl_3_4	pdb2n66
Bx_Prx_5	pdb2ljl
BxCYP33C4_5	pdb2kl6
Bx_cpl_3_3	pdb6nzl
BxATG16_4	pdb2m16
BxATG16_3	pdb2lk2
Bx_cpl_3_3	pdb3sdt
Bx_cpl_3_3	2lla
Bx_tlp_1_5	pdb2kz5
BxSapB1_2	pdb6jxu
Bx_tlp_1_3	pdb2lfi
BxATG16_3	pdb2kwb
BxATG16_3	pdb2kd1
Bx_Prx_5	pdb7mzz
Bx_cpl_3_3	pdb7wcg
Bx_tlp_1_5	pdb2l08
I0QYY0_9GAMM	pdb6pri
A0A1I7RKM9_BURXY	pdb2kt1
BxCYP33D3_3	pdb2kpt
SapB3_3	pdb2m16
BxSapB1_1	pdb2l7q
Bx_cpl_3_3	pdb2kvo
Bx_cpl_3_4	pdb2lv2
A0A1I7SCF8_BURXY	pdb2lnu
cyp_33C9_2	pdb2ll8
cyp_33C9_2	pdb6e4j
BxATG16_3	pdb2llf
BxCYP33C4_5	pdb2kwb
Bx_tlp_1_4	pdb2kim
Bx_tlp_1_3	pdb2kl3
Bx_tlp_1_5	pdb2ksi
BxSapB1_2	pdb2kwb
BxCYP33D3_3	pdb2kwb
cyp_33C9_2	pdb2lml
BxATG16_3	pdb6jxu
BxCYP33D3_3	pdb6o6w
BxSapB1_1	pdb2kl3
Bx_Prx_5	pdb2lek
BxCYP33C9_1	pdb6xrg
BxCYP33D3_3	pdb2lw4
cyp_33C9_1	pdb2ksi
Bx_cpl_3_4	pdb2kz5
BxATG16_4	pdb2m8x
BxSapB1_1	pdb2lio
Bx_Prx_5	pdb6xr7
BxCYP33C4_5	pdb2kct
BxSapB1_2	pdb6cgh
BxATG9_5	pdb2ksi
SapB3_3	2kl7
SapB3_5	pdb2kt1
BxSapB1_2	pdb2lf2
Bx_tlp_1_5	pdb2n69
Bx_tlp_1_4	pdb2kzw
BxSapB1_1	pdb2lna
Bx_tlp_1_4	pdb8ftx
cyp_33C9_1	pdb2kim
SapB3_3	7mzw
I0QYY0_9GAMM	pdb2kd1
Bx_tlp_1_4	pdb6xrg
A0A1I7RL37_BURXY	2kl7
Bx_tlp_1_5	pdb2kw2
cyp_33C9_5	pdb6xrg
BxCYP33D3_3	pdb3hbe
Bx_tlp_1_3	pdb2kpn
Bx_tlp_1_5	pdb2l05
BxATG16_3	pdb2kl6
cyp_33C9_2	pdb2n76
cyp_33C9_2	pdb2lni
Bx_tlp_1_5	pdb6ppt
Bx_tlp_1_3	pdb8ftx
Bx_cpl_3_4	pdb3sdq
BxATG16_4	pdb2n66
A0A1I7SCF8_BURXY	pdb8ftw
Bx_tlp_1_5	pdb2ma5
BxATG16_4	pdb7lns
Bx_tlp_1_4	pdb6nu4
cyp_33C9_2	pdb2kct
BxATG16_3	pdb2n76
cyp_33C9_2	pdb7m5t
Bx_Prx_5	pdb2kzx
I0QYY0_9GAMM	pdb2mm6
Bx_tlp_1_3	pdb2mry
A0A1I7RL37_BURXY	pdb8ubh
Bx_Prx_5	pdb7n99
A0A1I7SCF8_BURXY	pdb6e4j
cyp_33C9_1	pdb3hbh
BxSapB1_1	pdb5ks6
BxCYP33C4_5	pdb2n76
BxSapB1_1	pdb2kt7
I0QYY0_9GAMM	pdb3sdr
Bx_tlp_1_4	pdb2l0c
A0A1I7SCF8_BURXY	pdb2lq3
cyp_33C9_2	pdb2n3k
BxATG16_3	pdb2m16
Bx_tlp_1_4	pdb2m01
Bx_tlp_1_3	pdb2mk2
A0A1I7SCF8_BURXY	pdb2n76
Bx_cpl_3_4	pdb7m5t
Bx_Prx_5	pdb2kpn
BxSapB1_2	pdb2lnu
BxSapB1_1	pdb2nbn
I0QYY0_9GAMM	pdb2mk2
BxSapB1_2	pdb6prq
Bx_cpl_3_4	pdb2lch
cyp_33C9_2	pdb2l05
Bx_cpl_3_4	pdb2lso
Bx_tlp_1_4	pdb2n3k
Bx_cpl_3_1	pdb6xrg
Bx_cpl_2_5	2kcx
BxATG16_4	pdb2kpm
cyp_33C9_2	pdb3hbd
Bx_cpl_3_4	2lla
Bx_tlp_1_3	pdb2lek
BxCYP33C4_5	pdb8ftw
cyp_33C9_1	pdb8ftx
BxATG16_4	pdb5zau
BxCYP33D3_3	2kyq
Bx_cpl_2_5	pdb6xry
A0A1I7SCF8_BURXY	pdb2lgh
I0QYY0_9GAMM	pdb2l8v
Bx_tlp_1_4	pdb2lk2
BxSapB1_1	pdb2ltl
Bx_cpl_2_2	2kyq
I0QMH2_9GAMM	pdb8ftw
BxCYP33C4_5	pdb7n99
cyp_33C9_2	pdb7sxb
Bx_tlp_1_3	pdb2ksi
Bx_cpl_3_3	pdb2l07
Bx_cpl_3_4	pdb6pqe
BxCYP33C4_5	pdb2l9q
Bx_cpl_3_4	pdb2loy
Bx_tlp_1_5	pdb5zau
BxSapB1_2	pdb2ll8
Bx_cpl_3_3	pdb2l9p
Bx_tlp_1_5	pdb2kzw
I0QYY0_9GAMM	pdb6xr7
BxCYP33C4_5	pdb7qcc
cyp_33C9_2	pdb2loy
BxCYP33C4_5	pdb5zau
cyp_33C9_2	pdb2lok
SapB3_3	pdb6xrg
cyp_33C9_2	pdb6jxw
I0QMH2_9GAMM	pdb2mk2
Bx_tlp_1_3	pdb6pqe
BxATG16_4	pdb6prp
BxCYP33D3_3	pdb7wcg
Bx_cpl_3_3	pdb2kru
I0QYY0_9GAMM	pdb7qcb
BxATG16_4	pdb2l5q
BxATG16_3	pdb6jxw
BxCYP33D3_3	pdb2l05
I0QYY0_9GAMM	pdb5krw
BxATG16_3	pdb2m8x
BxCYP33C4_5	pdb7jyz
cyp_33C9_2	pdb2kif
Bx_tlp_1_4	pdb2mm6
I0QYY0_9GAMM	pdb2lcg
BxATG16_3	2kl7
Bx_tlp_1_4	pdb3sdr
Bx_tlp_1_3	pdb2kt7
A0A1I7RL37_BURXY	pdb7jyn
cyp_33C9_1	pdb7mzx
BxCYP33D3_3	pdb2lk2
Bx_tlp_1_3	pdb2kt8
BxATG16_3	pdb2ltl
BxCYP33C4_5	pdb2n75
cyp_33C9_2	pdb2lmd
A0A1I7SCF8_BURXY	pdb2l07
Bx_tlp_1_3	pdb2kct
BxCYP33D3_3	pdb5ks6
SapB3_3	pdb2ksi
BxATG16_3	pdb6amw
BxCYP33D3_3	pdb2l5q
I0QYY0_9GAMM	pdb2kt7
BxCYP33C4_5	pdb6ppt
BxATG16_3	pdb7kix
Bx_tlp_1_3	pdb2ma6
cyp_33C9_1	pdb2kwb
cyp_33C9_1	pdb2lxu
BxCYP33D3_3	pdb7kix
Bx_tlp_1_4	pdb2lw4
I0QYY0_9GAMM	pdb2mv0
BxCYP33C4_5	pdb7kix
BxATG9_5	2kcx
BxATG16_3	pdb7m5t
Bx_tlp_1_5	pdb2mv0
cyp_33C9_2	pdb6lqz
cyp_33C9_2	pdb5zau
Bx_tlp_1_3	pdb2l9q
cyp_33C9_1	pdb2ma6
BxSapB1_1	pdb7sxb
BxSapB1_1	pdb2kzv
BxATG16_4	pdb2lgh
BxATG16_4	pdb2ljl
A0A1I7RL37_BURXY	pdb2mh2
I0QYY0_9GAMM	pdb2kwb
Bx_cpl_3_3	pdb2lx7
SapB3_3	pdb7jyz
A0A1I7SCF8_BURXY	pdb2kpm
Bx_cpl_3_3	pdb2kct
A0A1I7SCF8_BURXY	pdb2lch
Bx_tlp_1_4	pdb7qcb
Bx_Prx_5	pdb6xry
BxSapB1_2	pdb7lu8
Bx_Prx_5	2lla
A0A1I7RL37_BURXY	pdb2l9q
BxATG9_5	pdb7kix
Bx_Prx_3	pdb2ksi
BxCYP33C4_5	pdb2mm5
BxCYP33C4_5	pdb2mry
A0A1I7SCF8_BURXY	pdb2lna
Bx_cpl_3_3	pdb7x5c
BxATG16_4	pdb2l9q
Bx_tlp_1_5	pdb2lv2
Bx_tlp_1_5	pdb6pq2
BxATG16_4	pdb3sdv
Bx_tlp_1_5	pdb2l09
BxSapB1_1	pdb6amv
Bx_cpl_3_3	pdb2l0c
Bx_tlp_1_5	pdb3sdq
Bx_tlp_1_3	2kl7
Bx_Prx_3	pdb2kru
Bx_Prx_3	2lla
Bx_Prx_5	pdb7qcb
Bx_Prx_5	pdb2l05
BxCYP33C4_5	pdb2mk2
Bx_cpl_2_2	pdb7jyn
cyp_33C9_1	pdb5nce
BxCYP33C4_5	pdb2m8x
BxSapB1_2	pdb3sdt
BxCYP33C4_5	pdb2lx7
BxSapB1_1	pdb2n76
BxATG16_3	pdb3sdv
A0A1I7RL37_BURXY	pdb2kzx
BxATG16_4	pdb2kct
BxATG16_4	pdb2kzx
Bx_Prx_5	pdb5nce
cyp_33C9_2	pdb6xry
Bx_cpl_3_3	pdb2kt1
BxCYP33D3_3	pdb2krt
SapB3_5	pdb6xry
BxCYP33C4_5	pdb2kpm
BxCYP33C9_2	pdb7kix
A0A1I7RL37_BURXY	pdb2lcg
BxSapB1_1	pdb7knv
cyp_33C9_1	pdb2kz5
BxSapB1_1	pdb2l82
Bx_cpl_3_3	pdb2ltl
Bx_cpl_3_4	pdb2lgh
cyp_33C9_2	pdb2lq3
BxATG16_3	pdb6pri
Bx_tlp_1_3	pdb7qcb
Bx_Prx_5	pdb2lw4
A0A1I7SCF8_BURXY	pdb7lns
BxSapB1_1	pdb5vso
Bx_tlp_1_3	pdb2nbn
SapB3_3	pdb2mk2
Bx_tlp_1_3	pdb2kkq
BxCYP33D3_3	pdb6nu4
A0A1I7RL37_BURXY	pdb2kd1
BxCYP33D3_3	pdb5nce
A0A1I7SCF8_BURXY	pdb7jyn
I0QYY0_9GAMM	pdb7n99
BxCYP33D3_3	pdb2kt7
Bx_cpl_2_3	2kl7
BxCYP33C9_2	pdb6kna
Bx_tlp_1_4	pdb2kt8
BxCYP33D3_3	pdb2ljw
SapB3_5	2lla
SapB3_3	2kcx
BxATG16_4	pdb6prj
Bx_tlp_1_5	pdb2m16
Bx_tlp_1_3	pdb5kp0
I0QMH2_9GAMM	pdb2l05
cyp_33C9_1	pdb2krt
A0A1I7RKM9_BURXY	pdb6xry
A0A1I7SCF8_BURXY	pdb8ubh
I0QYY0_9GAMM	pdb2lxu
BxSapB1_2	pdb2l9p
Bx_cpl_2_4	2kyq
BxATG16_4	pdb2mm5
A0A1I7SCF8_BURXY	pdb6prq
A0A1I7RL37_BURXY	2lla
BxSapB1_2	pdb6amw
cyp_33C9_2	pdb2n66
BxCYP33D3_3	pdb2lx7
BxCYP33D3_5	2kl7
cyp_33C9_1	pdb6ppt
A0A1I7RL37_BURXY	pdb6xr7
BxCYP33C4_5	pdb2luz
BxATG16_4	pdb2kru
cyp_33C9_1	pdb2lml
BxSapB1_1	pdb2ksh
Bx_cpl_3_3	pdb2ksi
BxCYP33C4_5	pdb4lej
BxSapB1_2	pdb3sdr
BxCYP33C9_2	pdb6xry
cyp_33C9_1	pdb7sxb
Bx_cpl_3_3	pdb2lna
A0A1I7RL37_BURXY	pdb2kru
BxCYP33C4_5	pdb2lxu
Bx_cpl_3_4	pdb2mv0
A0A1I7SCF8_BURXY	pdb2n3k
BxSapB1_1	pdb2kwb
Bx_tlp_1_5	2kyq
Bx_tlp_1_3	pdb2luz
A0A1I7SCF8_BURXY	pdb2kwb
Bx_tlp_1_3	pdb2l0d
Bx_tlp_1_4	pdb8ubh
A0A1I7SCF8_BURXY	pdb3sdt
Bx_cpl_2_2	pdb6xry
BxATG16_3	pdb2kpt
Bx_cpl_3_4	pdb3sdr
BxCYP33C4_5	pdb5vso
BxATG16_4	pdb6e4j
BxCYP33D3_3	pdb7mzx
A0A1I7SCF8_BURXY	pdb2l82
SapB3_3	pdb2l3f
I0QMH2_9GAMM	pdb6kna
SapB3_3	2kyq
BxCYP33C4_5	pdb2kl3
Bx_cpl_3_4	pdb6xrg
BxATG16_4	pdb3sdt
Bx_cpl_3_3	pdb2lok
BxATG16_3	pdb2kt1
BxCYP33C4_5	pdb5krw
Bx_cpl_3_3	pdb6xry
Bx_tlp_1_3	pdb6pri
BxCYP33D3_3	pdb3sdt
I0QYY0_9GAMM	pdb6jxu
BxATG16_3	pdb3hbh
BxATG16_4	pdb2lnu
cyp_33C9_2	pdb7knv
BxATG16_4	pdb2lml
Bx_tlp_1_4	pdb2kct
Bx_cpl_3_3	pdb6xr7
BxSapB1_2	pdb5uke
BxCYP33D3_3	pdb2l3f
A0A1I7SCF8_BURXY	pdb2lx7
BxSapB1_2	pdb6pqm
A0A1I7RKM9_BURXY	pdb2kru
Bx_cpl_3_4	pdb7lu8
BxATG16_4	pdb2ma6
BxCYP33C4_3	2kyq
Bx_cpl_3_4	2kl7
Bx_tlp_1_5	pdb2lek
Bx_cpl_3_3	pdb7mzz
BxSapB1_2	pdb3sdq
cyp_33C9_1	pdb3hbd
BxSapB1_2	pdb2kz5
A0A1I7SCF8_BURXY	pdb7kix
BxCYP33C4_5	pdb2mbl
BxATG16_4	pdb2lna
Bx_cpl_3_3	pdb2kpn
BxATG16_3	pdb2mbl
cyp_33C9_2	pdb3sdr
BxATG16_4	pdb2llf
BxCYP33D3_3	pdb2m16
Bx_tlp_1_4	pdb2mbm
A0A1I7RL37_BURXY	pdb2krt
BxATG16_3	pdb2lx7
cyp_33C9_1	pdb2kvo
BxCYP33D3_5	pdb6xrg
Bx_cpl_3_4	pdb2kw2
Bx_cpl_3_3	pdb6pqe
Bx_cpl_3_3	pdb2lnb
Bx_tlp_1_3	pdb2l0a
BxATG16_3	pdb2luz
cyp_33C9_1	pdb6xr7
A0A1I7RKM9_BURXY	pdb7jyz
BxATG16_4	pdb6o6w
I0QYY0_9GAMM	pdb2ljl
BxSapB1_2	pdb2mh2
Bx_cpl_2_4	2kcx
Bx_cpl_3_3	pdb2lv2
BxATG16_4	pdb6pq2
Bx_Prx_5	pdb6amw
A0A1I7RL37_BURXY	pdb7lns
Bx_Prx_5	pdb6xr6
Bx_cpl_3_4	pdb2n75
cyp_33C9_2	pdb2lgh
Bx_tlp_1_4	pdb2kif
SapB3_3	pdb2l5q
cyp_33C9_2	pdb2kzw
BxCYP33C4_5	pdb2ljl
Bx_cpl_3_4	pdb2kl6
A0A1I7SCF8_BURXY	pdb7qcb
BxATG16_3	pdb2kt7
BxATG16_4	pdb2l08
A0A1I7RL37_BURXY	pdb3sdt
Bx_tlp_1_5	pdb2lio
BxATG16_3	pdb6xrg
BxSapB1_2	pdb7kix
A0A1I7SCF8_BURXY	pdb4lej
Bx_tlp_1_5	pdb2m8x
Bx_cpl_3_3	pdb6xr6
BxATG9_5	2kyq
A0A1I7SCF8_BURXY	pdb2lcg
cyp_33C9_1	pdb6cgh
I0QYY0_9GAMM	pdb2kkq
BxCYP33D3_3	pdb2luz
BxSapB1_1	pdb2kpt
BxCYP33C9_1	pdb6xr7
Bx_tlp_1_3	pdb2lq3
Bx_Prx_5	pdb6pqm
Bx_tlp_1_4	pdb2lfi
cyp_33C9_2	pdb2l0c
BxATG9_5	pdb2l07
I0QYY0_9GAMM	pdb5kp0
BxSapB1_2	pdb2l0d
Bx_tlp_1_3	pdb2ljw
Bx_tlp_1_4	pdb2l82
cyp_33C9_1	pdb2kw6
I0QYY0_9GAMM	pdb2kpm
Bx_cpl_3_4	pdb3hbe
BxSapB1_1	pdb2mh2
BxATG16_4	pdb2m47
I0QYY0_9GAMM	pdb2ma5
BxATG16_4	pdb2mk2
cyp_33C9_1	pdb2loy
I0QYY0_9GAMM	pdb2kl6
Bx_tlp_1_3	pdb2lw4
SapB3_5	pdb2l5q
BxSapB1_2	pdb2krt
A0A1I7SCF8_BURXY	pdb2lmd
[truncated: 689 more rows]
