# Supplementary material for: Prediction of protein interactions between pine and pine wood nematode using deep learning and multi-dimensional feature fusion
Source: Front Plant Sci. 2024 Dec 2;15:1489116. doi: 10.3389/fpls.2024.1489116 (PMC11646721; doi:10.3389/fpls.2024.1489116)
Supplement: Supplementary file 3 [file Table2.xlsx]

## Sheet: 新建 Microsoft Excel 工作表
Node1	Node2	PPI
BxCYP33D3_3	pdb2lml	1
BxSapB1_2	pdb2lq3	1
A0A1I7RL37_BURXY	7mzw	1
Bx_cpl_3_4	pdb2kzv	1
BxATG16_3	pdb2lf2	1
Bx_cpl_3_4	pdb5vso	1
I0QYY0_9GAMM	pdb2lnu	1
BxCYP33C4_5	pdb6kna	1
I0QYY0_9GAMM	pdb4lej	1
BxSapB1_1	pdb8ftw	1
Bx_tlp_1_5	pdb6xry	1
Bx_tlp_1_4	pdb4lej	1
cyp_33C9_2	pdb5krw	1
BxATG16_4	pdb2lek	1
Bx_Prx_5	pdb2mk2	1
BxSapB1_1	2kcx	1
cyp_33C9_1	pdb7wcg	1
Bx_tlp_1_4	pdb5ks6	1
Bx_tlp_1_5	pdb2kif	1
BxATG16_3	pdb2kzv	1
cyp_33C9_5	pdb7jyn	1
Bx_cpl_3_3	pdb6pqm	1
cyp_33C9_2	pdb6nu4	1
Bx_cpl_3_3	pdb3sdq	1
cyp_33C9_2	pdb6amv	1
A0A1I7RL37_BURXY	pdb2lni	1
BxATG16_4	pdb5vso	1
I0QYY0_9GAMM	pdb2lmd	1
BxCYP33D3_3	pdb2nbn	1
BxCYP33C4_5	pdb2n66	1
BxCYP33D3_3	pdb7sxb	1
Bx_cpl_2_5	pdb6xr6	1
A0A1I7SCF8_BURXY	pdb2m16	1
cyp_33C9_2	pdb6amw	1
SapB3_5	pdb7jyz	1
I0QYY0_9GAMM	pdb2llf	1
Bx_tlp_1_5	pdb2ltl	1
Bx_cpl_3_3	pdb7mzx	1
BxCYP33D3_3	pdb2kct	1
BxCYP33C4_5	pdb2lso	1
A0A1I7SCF8_BURXY	pdb2l0c	1
Bx_tlp_1_5	pdb2lcg	1
BxATG16_4	pdb2lso	1
I0QMH2_9GAMM	pdb6xr7	1
Bx_tlp_1_4	2kl7	1
BxATG16_3	pdb2l07	1
Bx_tlp_1_4	pdb5z55	1
Bx_cpl_3_4	pdb6j4i	1
BxCYP33C9_2	pdb8ftx	1
Bx_tlp_1_3	pdb2ma5	1
BxSapB1_2	pdb2lni	1
BxCYP33D3_3	pdb3hbh	1
Bx_Prx_5	pdb2ksi	1
BxATG16_4	2kyq	1
BxCYP33D3_3	pdb2ma5	1
Bx_cpl_3_3	pdb2l05	1
BxSapB1_1	pdb2l09	1
Bx_tlp_1_4	pdb8ftw	1
BxCYP33C4_5	pdb2lnb	1
Bx_tlp_1_4	pdb6xr6	1
I0QYY0_9GAMM	pdb7mzx	1
Bx_tlp_1_3	pdb6xr7	1
I0QYY0_9GAMM	pdb2l5q	1
BxCYP33D3_3	pdb2mry	1
Bx_tlp_1_3	pdb6kna	1
A0A1I7SCF8_BURXY	pdb7wcg	1
Bx_cpl_3_3	pdb2kzw	1
BxCYP33C9_2	pdb7lu8	1
Bx_tlp_1_5	pdb2l3f	1
BxATG16_3	pdb3sdt	1
BxCYP33C9_2	2kyq	1
Bx_tlp_1_5	pdb7n99	1
Bx_tlp_1_3	pdb7qcc	1
BxCYP33C9_2	pdb7knv	1
BxCYP33C4_5	pdb2lok	1
I0QYY0_9GAMM	pdb2kru	1
A0A1I7SCF8_BURXY	pdb6amv	1
Bx_tlp_1_3	pdb2lni	1
I0QMH2_9GAMM	pdb2l9q	1
cyp_33C9_2	pdb6o6w	1
Bx_cpl_3_3	pdb2m8x	1
BxSapB1_1	pdb2lfi	1
BxCYP33C9_2	pdb2mh2	1
BxATG9_5	pdb2krt	1
Bx_cpl_3_4	7mzw	1
Bx_cpl_3_4	pdb2kpn	1
cyp_33C9_2	pdb2kw6	1
BxSapB1_1	pdb2kzx	1
Bx_tlp_1_3	pdb2m8x	1
cyp_33C9_1	pdb2m47	1
A0A1I7RL37_BURXY	pdb3sdr	1
Bx_Prx_5	pdb2l7q	1
Bx_cpl_3_4	pdb2l82	1
Bx_cpl_3_3	pdb6j4i	1
BxCYP33D3_3	pdb3sae	1
BxSapB1_1	pdb2kkq	1
Bx_cpl_2_2	pdb7jyz	1
A0A1I7RL37_BURXY	pdb6xry	1
cyp_33C9_1	pdb2ljl	1
Bx_cpl_3_3	pdb2kzv	1
cyp_33C9_1	pdb6xr6	1
Bx_Prx_5	pdb2kru	1
BxCYP33C4_5	pdb2kz5	1
BxCYP33C9_2	pdb2kwb	1
cyp_33C9_1	pdb2l9q	1
BxCYP33D3_3	pdb2lf2	1
cyp_33C9_1	pdb2kw2	1
Bx_tlp_1_3	pdb2n66	1
Bx_Prx_3	2kcx	1
BxATG16_3	pdb2lxu	1
Bx_tlp_1_5	pdb2kt8	1
BxCYP33D3_3	pdb2l08	1
Bx_tlp_1_5	pdb6e4j	1
I0QYY0_9GAMM	pdb2kt8	1
BxATG16_3	pdb2l9q	1
cyp_33C9_1	pdb2ltl	1
I0QYY0_9GAMM	pdb2l07	1
BxATG16_4	pdb2l09	1
BxSapB1_1	pdb6nzl	1
BxATG16_4	pdb2kz5	1
BxSapB1_2	pdb2kpn	1
I0QYY0_9GAMM	pdb2lek	1
A0A1I7RL37_BURXY	pdb7m5t	1
BxCYP33C9_2	pdb6xr6	1
A0A1I7RKM9_BURXY	pdb2m16	1
BxATG16_4	pdb2kwb	1
Bx_tlp_1_5	pdb6lqz	1
Bx_Prx_5	pdb8ftw	1
I0QYY0_9GAMM	pdb2lfi	1
BxATG16_3	pdb2lso	1
BxATG16_3	pdb2mh2	1
BxSapB1_2	pdb7mzx	1
BxCYP33D3_3	pdb2mh2	1
Bx_cpl_3_4	pdb2lmd	1
BxSapB1_1	pdb2kt1	1
BxCYP33D3_3	pdb2kkq	1
A0A1I7SCF8_BURXY	pdb2lfi	1
Bx_cpl_3_4	pdb2ljl	1
BxSapB1_2	pdb2lze	1
BxCYP33D3_3	pdb2kpn	1
Bx_tlp_1_3	pdb2lio	1
Bx_Prx_3	pdb7jyz	1
Bx_tlp_1_4	pdb2lok	1
A0A1I7RL37_BURXY	pdb2loy	1
BxCYP33D3_3	pdb5vso	1
BxSapB1_1	pdb7kix	1
Bx_tlp_1_5	pdb6prp	1
Bx_cpl_2_3	pdb2mk2	1
SapB3_3	pdb2l9q	1
Bx_tlp_1_3	pdb4lej	1
BxATG16_3	pdb5uke	1
cyp_33C9_1	pdb6amv	1
BxSapB1_1	pdb6jxu	1
Bx_tlp_1_5	pdb7jyz	1
Bx_cpl_3_4	pdb2n3k	1
BxATG16_3	pdb6o6w	1
cyp_33C9_1	pdb6nzl	1
I0QYY0_9GAMM	pdb6prq	1
Bx_tlp_1_5	pdb2kwb	1
cyp_33C9_2	pdb6kna	1
cyp_33C9_2	pdb3sae	1
A0A1I7SCF8_BURXY	pdb2kru	1
Bx_cpl_3_3	pdb2kpm	1
BxCYP33D3_3	pdb6e4j	1
cyp_33C9_2	2lla	1
Bx_tlp_1_4	pdb3sdq	1
Bx_cpl_3_4	pdb7x5c	1
BxCYP33D3_3	2kl7	1
BxSapB1_2	pdb2kd1	1
I0QYY0_9GAMM	pdb2lio	1
Bx_Prx_5	pdb2loy	1
BxCYP33D3_3	pdb2kl3	1
Bx_Prx_3	pdb2ksh	1
SapB3_3	pdb6xr6	1
BxCYP33D3_3	pdb7qcc	1
I0QYY0_9GAMM	pdb5nce	1
cyp_33C9_1	pdb2mv0	1
BxCYP33D3_3	pdb6amv	1
Bx_cpl_3_4	pdb2luz	1
I0QYY0_9GAMM	pdb2lak	1
I0QYY0_9GAMM	pdb2lch	1
BxSapB1_1	pdb2n75	1
cyp_33C9_2	pdb2lx7	1
BxATG16_4	pdb7x5c	1
BxCYP33D3_3	pdb6pqe	1
cyp_33C9_1	pdb2kd1	1
BxATG16_4	pdb2kt7	1
BxCYP33C9_2	pdb7lns	1
Bx_cpl_3_4	pdb5uke	1
BxSapB1_1	pdb7jyn	1
BxSapB1_1	pdb2m16	1
Bx_tlp_1_3	pdb6prq	1
cyp_33C9_1	pdb2lk2	1
BxATG16_4	pdb6prq	1
Bx_tlp_1_5	pdb7knv	1
BxCYP33D3_5	2kyq	1
A0A1I7SCF8_BURXY	pdb2l09	1
I0QYY0_9GAMM	pdb3sdq	1
cyp_33C9_1	pdb5zau	1
Bx_cpl_3_4	pdb2l3f	1
A0A1I7RKM9_BURXY	pdb6xr6	1
cyp_33C9_1	2lla	1
BxSapB1_2	pdb6prp	1
Bx_tlp_1_4	pdb6e4j	1
Bx_cpl_3_4	pdb2lk2	1
cyp_33C9_2	pdb2ltl	1
Bx_tlp_1_5	pdb2lnb	1
Bx_tlp_1_3	pdb6lqz	1
Bx_tlp_1_4	pdb7mzz	1
BxSapB1_1	pdb2lw4	1
BxSapB1_1	pdb8ftx	1
BxATG16_3	pdb2mm6	1
Bx_tlp_1_5	pdb7wcg	1
Bx_cpl_3_3	pdb2n76	1
Bx_tlp_1_4	pdb2mk2	1
A0A1I7RKM9_BURXY	2kcx	1
Bx_tlp_1_4	pdb7qcc	1
Bx_tlp_1_3	pdb2n76	1
BxATG16_4	pdb2luz	1
Bx_cpl_3_4	2kyq	1
Bx_tlp_1_5	pdb2nbn	1
cyp_33C9_2	pdb2lfi	1
Bx_tlp_1_4	pdb2kl3	1
A0A1I7RL37_BURXY	pdb7mzx	1
Bx_tlp_1_3	pdb2n75	1
Bx_Prx_3	pdb2l3f	1
BxSapB1_2	pdb6xr6	1
cyp_33C9_1	pdb8ubh	1
BxSapB1_2	pdb2lw4	1
Bx_tlp_1_3	pdb2kwb	1
A0A1I7SCF8_BURXY	pdb2ll8	1
A0A1I7SCF8_BURXY	pdb5z55	1
cyp_33C9_1	pdb2n75	1
I0QMH2_9GAMM	2kcx	1
A0A1I7SCF8_BURXY	pdb2ma5	1
BxATG16_3	pdb4lej	1
A0A1I7SCF8_BURXY	pdb7lu8	1
BxCYP33C9_1	2kyq	1
BxATG16_4	pdb2n3k	1
A0A1I7SCF8_BURXY	pdb2kkq	1
BxATG16_3	pdb2lze	1
A0A1I7SCF8_BURXY	pdb2mry	1
Bx_tlp_1_3	7mzw	1
Bx_tlp_1_4	pdb2l0d	1
Bx_Prx_5	pdb7lns	1
BxCYP33C4_5	pdb7sxb	1
BxSapB1_1	pdb2lak	1
cyp_33C9_2	pdb2lek	1
Bx_tlp_1_3	pdb6o6w	1
cyp_33C9_1	pdb2kt8	1
BxCYP33C4_5	pdb6pqe	1
Bx_tlp_1_3	pdb3sdv	1
A0A1I7SCF8_BURXY	pdb2n66	1
I0QYY0_9GAMM	pdb2lnb	1
Bx_cpl_3_4	pdb5kp0	1
BxSapB1_2	pdb2lcg	1
Bx_cpl_3_3	pdb6lqz	1
BxCYP33D3_3	7mzw	1
BxATG16_4	pdb2lk2	1
BxATG16_4	2kcx	1
BxCYP33C4_5	pdb2n3k	1
Bx_cpl_3_4	pdb2lek	1
BxCYP33C4_5	pdb6pri	1
Bx_tlp_1_5	pdb2lch	1
BxCYP33C4_5	pdb2l09	1
BxSapB1_2	pdb2l09	1
BxATG9_5	pdb7jyn	1
cyp_33C9_1	pdb2kpn	1
Bx_tlp_1_3	pdb2kzx	1
cyp_33C9_2	pdb5vso	1
BxCYP33D3_3	pdb2mv0	1
I0QYY0_9GAMM	pdb7knv	1
Bx_tlp_1_5	pdb2n75	1
Bx_tlp_1_3	pdb2lv2	1
Bx_cpl_3_3	pdb3sdu	1
Bx_Prx_5	pdb2lfi	1
cyp_33C9_1	pdb2lgh	1
BxATG16_3	pdb7n99	1
BxSapB1_2	pdb6pq2	1
cyp_33C9_2	pdb6pri	1
BxCYP33C9_1	pdb2m16	1
cyp_33C9_2	pdb5uke	1
Bx_cpl_3_4	pdb2ljw	1
BxCYP33D3_3	pdb2lze	1
BxSapB1_2	pdb6amv	1
A0A1I7SCF8_BURXY	2kl7	1
Bx_tlp_1_4	pdb6amv	1
A0A1I7SCF8_BURXY	pdb3sdq	1
Bx_cpl_3_3	pdb2kkq	1
Bx_tlp_1_3	pdb2m16	1
SapB3_5	pdb8ubh	1
Bx_cpl_3_4	pdb6xr7	1
Bx_cpl_3_4	pdb2kru	1
BxATG9_5	2kl7	1
BxSapB1_2	pdb2kl6	1
Bx_cpl_3_3	pdb7kix	1
cyp_33C9_2	pdb2kpt	1
Bx_cpl_3_3	pdb2nbn	1
A0A1I7SCF8_BURXY	pdb2lnb	1
BxCYP33C4_5	pdb2lf2	1
I0QMH2_9GAMM	pdb2kt1	1
BxSapB1_2	pdb2kkq	1
Bx_tlp_1_3	pdb2l9p	1
Bx_tlp_1_5	pdb7m5t	1
BxATG16_3	pdb8ftw	1
BxCYP33C4_5	pdb2mm6	1
BxCYP33D3_3	pdb2l0a	1
I0QYY0_9GAMM	pdb2l0c	1
BxSapB1_2	pdb2ljw	1
Bx_tlp_1_3	pdb2lmd	1
Bx_tlp_1_5	pdb6xrg	1
Bx_cpl_3_4	pdb5ks6	1
BxATG16_3	pdb5nce	1
BxATG16_3	pdb2n3k	1
BxATG16_4	pdb6cgh	1
cyp_33C9_2	pdb5nce	1
BxSapB1_1	pdb6kna	1
cyp_33C9_2	pdb2n75	1
BxSapB1_2	pdb2lgh	1
cyp_33C9_2	pdb2l9q	1
Bx_tlp_1_3	pdb2kzv	1
cyp_33C9_2	2kyq	1
SapB3_5	pdb6xrg	1
Bx_Prx_3	2kl7	1
A0A1I7SCF8_BURXY	pdb2lw4	1
BxATG16_4	pdb2mbm	1
Bx_tlp_1_4	pdb2lcg	1
BxSapB1_2	pdb6xry	1
A0A1I7RL37_BURXY	pdb2l05	1
I0QYY0_9GAMM	pdb2m47	1
cyp_33C9_5	pdb6xry	1
BxCYP33D3_3	pdb2n75	1
Bx_tlp_1_4	pdb7wcg	1
Bx_cpl_3_4	pdb7mzz	1
A0A1I7SCF8_BURXY	pdb2ltl	1
Bx_cpl_3_4	pdb8ftx	1
Bx_cpl_3_3	pdb2ljw	1
Bx_tlp_1_5	pdb2kl6	1
Bx_cpl_3_4	pdb2l08	1
BxCYP33D3_3	pdb2kim	1
SapB3_5	pdb6xr7	1
I0QYY0_9GAMM	pdb2ma6	1
Bx_tlp_1_5	pdb2ksh	1
BxCYP33C9_2	2lla	1
Bx_Prx_3	pdb6xr6	1
A0A1I7SCF8_BURXY	pdb2l08	1
BxSapB1_1	pdb7jyz	1
cyp_33C9_1	pdb2l5q	1
A0A1I7SCF8_BURXY	pdb2lso	1
BxATG16_3	pdb2lni	1
BxATG16_4	pdb6xr6	1
Bx_tlp_1_4	pdb5krw	1
cyp_33C9_1	pdb7lns	1
BxSapB1_1	pdb2ksi	1
cyp_33C9_1	pdb7m5t	1
Bx_tlp_1_4	pdb2lnb	1
Bx_cpl_3_1	pdb7jyn	1
cyp_33C9_1	pdb2mbl	1
BxCYP33C9_2	pdb2mk2	1
BxSapB1_2	pdb2kt7	1
A0A1I7RL37_BURXY	pdb2kw2	1
BxSapB1_1	7mzw	1
Bx_Prx_3	pdb7jyn	1
A0A1I7RKM9_BURXY	pdb6xr7	1
BxCYP33D3_3	pdb6jxu	1
Bx_cpl_3_3	pdb7lns	1
cyp_33C9_1	pdb2mm5	1
cyp_33C9_1	pdb6lqz	1
I0QYY0_9GAMM	pdb2lok	1
Bx_tlp_1_4	pdb7mzx	1
I0QYY0_9GAMM	pdb8ftw	1
BxCYP33D3_3	pdb3sdv	1
Bx_cpl_3_3	2kyq	1
Bx_tlp_1_5	pdb2n66	1
BxATG16_4	pdb7m5t	1
Bx_tlp_1_5	pdb2lak	1
cyp_33C9_1	pdb2n76	1
cyp_33C9_2	pdb7wcg	1
BxCYP33D3_3	pdb7lns	1
Bx_cpl_3_3	pdb2lk2	1
cyp_33C9_1	pdb3sdv	1
BxSapB1_1	pdb5krw	1
BxCYP33C4_5	pdb7mzx	1
Bx_tlp_1_5	2lla	1
Bx_tlp_1_4	pdb6jxu	1
Bx_tlp_1_4	pdb2ljw	1
BxATG16_3	pdb7sxb	1
I0QYY0_9GAMM	pdb3sdu	1
Bx_tlp_1_4	pdb2ltl	1
Bx_tlp_1_3	pdb2lx7	1
cyp_33C9_1	pdb5vso	1
Bx_tlp_1_4	pdb2mbl	1
BxATG16_3	pdb2lw4	1
Bx_cpl_2_5	pdb2mk2	1
BxCYP33C9_1	pdb7jyz	1
Bx_cpl_3_4	pdb6jxw	1
BxSapB1_1	pdb2lml	1
Bx_tlp_1_3	pdb7wcg	1
BxSapB1_1	pdb2llf	1
cyp_33C9_5	pdb6xr7	1
BxATG16_4	pdb2lq3	1
SapB3_3	pdb6xr7	1
Bx_tlp_1_4	pdb5nce	1
Bx_cpl_3_3	pdb8ftx	1
BxCYP33C4_5	pdb7wcg	1
BxCYP33C4_5	pdb2kd1	1
cyp_33C9_2	pdb6prq	1
SapB3_3	pdb7kix	1
BxATG9_5	pdb2l3f	1
BxCYP33C4_5	pdb3hbe	1
Bx_tlp_1_4	7mzw	1
Bx_cpl_3_3	pdb2loy	1
I0QYY0_9GAMM	2lla	1
Bx_tlp_1_3	pdb3sdt	1
Bx_tlp_1_4	pdb2kzx	1
BxATG16_4	pdb2mbl	1
BxSapB1_1	pdb6pqm	1
Bx_cpl_3_4	pdb6pq2	1
Bx_Prx_5	pdb7lu8	1
BxCYP33C9_2	pdb2krt	1
Bx_cpl_3_4	pdb6prj	1
Bx_tlp_1_4	pdb2mh2	1
Bx_cpl_3_3	pdb2ksh	1
BxSapB1_2	pdb2l05	1
BxCYP33D3_5	2kcx	1
Bx_tlp_1_5	pdb2l0d	1
BxATG16_3	7mzw	1
A0A1I7SCF8_BURXY	pdb2lf2	1
Bx_Prx_5	pdb2lnu	1
cyp_33C9_1	pdb2ll8	1
A0A1I7SCF8_BURXY	pdb2kz5	1
Bx_tlp_1_4	pdb2l5q	1
I0QYY0_9GAMM	pdb5ks6	1
BxSapB1_2	pdb6pri	1
BxATG16_4	pdb2ljw	1
I0QYY0_9GAMM	pdb2n76	1
BxCYP33D3_3	pdb7mzz	1
cyp_33C9_2	pdb2kkq	1
cyp_33C9_2	pdb2kw2	1
BxATG16_4	pdb2ksh	1
Bx_tlp_1_3	pdb2mbl	1
BxCYP33C9_2	pdb2lcg	1
BxCYP33C4_5	pdb6nu4	1
BxCYP33D3_3	pdb6prq	1
Bx_tlp_1_5	pdb2mm5	1
BxSapB1_2	pdb5ks6	1
BxATG16_3	pdb2l0a	1
BxATG16_4	pdb2lze	1
cyp_33C9_2	pdb2kpn	1
BxCYP33C4_5	pdb6xry	1
Bx_cpl_3_4	pdb2kkq	1
BxATG16_4	pdb2kl6	1
BxCYP33C4_5	pdb6prj	1
BxATG16_4	pdb2ma5	1
A0A1I7SCF8_BURXY	pdb6amw	1
cyp_33C9_1	pdb2lq3	1
cyp_33C9_2	pdb6ppt	1
Bx_tlp_1_4	pdb2ma5	1
Bx_tlp_1_4	pdb6o6w	1
A0A1I7RL37_BURXY	pdb2l5q	1
BxATG16_4	pdb6jxw	1
A0A1I7RKM9_BURXY	pdb7jyn	1
Bx_tlp_1_4	pdb2l05	1
A0A1I7SCF8_BURXY	pdb6xr6	1
I0QYY0_9GAMM	pdb6nu4	1
BxCYP33C4_5	pdb3sdq	1
A0A1I7RL37_BURXY	pdb2lnu	1
BxATG16_3	pdb2l8v	1
cyp_33C9_1	pdb7jyz	1
BxCYP33D3_3	pdb7n99	1
Bx_tlp_1_5	pdb2lw4	1
BxCYP33C4_5	pdb6amw	1
BxCYP33D3_3	pdb2kzw	1
I0QYY0_9GAMM	pdb7jyn	1
Bx_cpl_3_4	pdb7mzx	1
Bx_tlp_1_4	pdb2ljl	1
I0QYY0_9GAMM	pdb2l0a	1
BxSapB1_2	pdb2lio	1
A0A1I7SCF8_BURXY	pdb2lze	1
Bx_Prx_5	pdb2kt1	1
BxATG16_3	pdb6j4i	1
BxCYP33D3_3	pdb2kvo	1
BxATG16_4	pdb4lej	1
BxSapB1_1	pdb2m8x	1
Bx_tlp_1_3	pdb2ltl	1
I0QYY0_9GAMM	pdb2m01	1
BxATG16_3	pdb2lgh	1
Bx_tlp_1_4	pdb7sxb	1
BxATG16_4	pdb7wcg	1
Bx_tlp_1_3	pdb2l05	1
cyp_33C9_2	pdb2mh2	1
Bx_Prx_5	2kcx	1
BxSapB1_1	pdb5nce	1
BxCYP33C4_5	pdb2nbn	1
BxATG9_5	pdb6xr7	1
cyp_33C9_1	pdb6o6w	1
BxCYP33D3_3	pdb3hbd	1
I0QYY0_9GAMM	pdb2lx7	1
SapB3_3	pdb8ftx	1
A0A1I7SCF8_BURXY	pdb2kw6	1
BxATG16_4	pdb2lw4	1
cyp_33C9_1	pdb7mzz	1
Bx_cpl_3_3	pdb2l3f	1
A0A1I7RL37_BURXY	pdb2l7q	1
Bx_tlp_1_5	pdb2kim	1
BxATG16_3	pdb5vso	1
BxATG16_4	pdb2ll8	1
BxATG16_3	pdb2n69	1
BxATG16_3	2lla	1
Bx_cpl_2_2	pdb6xrg	1
BxSapB1_1	pdb2l3f	1
Bx_Prx_5	pdb2lf2	1
Bx_cpl_3_4	pdb2l09	1
cyp_33C9_1	pdb2lni	1
Bx_Prx_5	pdb2kt8	1
BxSapB1_1	pdb2lnb	1
Bx_Prx_5	pdb3sdt	1
BxCYP33C4_5	pdb5z55	1
BxSapB1_1	pdb2lf2	1
BxATG16_3	pdb2kim	1
BxCYP33D3_3	pdb2kif	1
Bx_tlp_1_5	pdb6xr6	1
Bx_cpl_3_1	pdb7jyz	1
cyp_33C9_1	pdb2lnb	1
BxCYP33C4_5	2kyq	1
BxCYP33D3_3	pdb2mm5	1
BxATG16_4	pdb2l3f	1
cyp_33C9_2	pdb2kt1	1
cyp_33C9_1	pdb2lmd	1
Bx_tlp_1_5	pdb2lna	1
A0A1I7SCF8_BURXY	pdb2kpn	1
cyp_33C9_1	pdb2mbm	1
BxCYP33C4_5	2kcx	1
I0QYY0_9GAMM	pdb2krt	1
BxCYP33D3_3	pdb2ksh	1
Bx_tlp_1_3	pdb8ftw	1
SapB3_5	2kyq	1
BxCYP33C4_5	pdb2lna	1
BxATG16_4	pdb2kif	1
Bx_tlp_1_4	pdb2loy	1
Bx_tlp_1_3	pdb5ks6	1
cyp_33C9_1	pdb6pq2	1
A0A1I7RKM9_BURXY	pdb2ksi	1
BxATG16_3	pdb2lml	1
BxSapB1_2	pdb2lk2	1
BxATG16_4	pdb2l8v	1
BxATG9_5	2lla	1
A0A1I7RL37_BURXY	pdb2l07	1
Bx_cpl_3_3	pdb7n99	1
A0A1I7RL37_BURXY	pdb6kna	1
Bx_tlp_1_5	pdb2kzx	1
BxSapB1_1	pdb2kzw	1
cyp_33C9_2	pdb2ksh	1
BxSapB1_1	pdb2l8v	1
BxCYP33C4_5	pdb6cgh	1
Bx_Prx_5	pdb2lcg	1
cyp_33C9_1	pdb6nu4	1
I0QYY0_9GAMM	pdb2n75	1
Bx_cpl_2_4	pdb6xrg	1
Bx_cpl_2_3	2kcx	1
BxCYP33C9_2	pdb2ksh	1
BxSapB1_1	pdb2krt	1
BxSapB1_1	pdb2m47	1
Bx_tlp_1_3	pdb7kix	1
A0A1I7SCF8_BURXY	pdb2krt	1
cyp_33C9_1	pdb2mh2	1
Bx_Prx_5	pdb2kz5	1
Bx_tlp_1_4	2kyq	1
cyp_33C9_3	2kcx	1
Bx_Prx_5	pdb2kt7	1
Bx_tlp_1_3	pdb5vso	1
BxSapB1_1	pdb2kim	1
cyp_33C9_1	pdb6xrg	1
Bx_cpl_3_4	pdb2l8v	1
Bx_cpl_3_3	pdb2l9q	1
BxSapB1_1	pdb2ljw	1
I0QYY0_9GAMM	pdb6amv	1
Bx_tlp_1_3	pdb2lml	1
Bx_cpl_3_3	pdb6e4j	1
BxCYP33C4_5	pdb2l7q	1
cyp_33C9_2	pdb2kt7	1
BxSapB1_1	pdb2lch	1
cyp_33C9_1	pdb2l8v	1
Bx_cpl_3_4	pdb2l0a	1
BxATG16_4	pdb2lfi	1
Bx_tlp_1_4	pdb3sae	1
A0A1I7RKM9_BURXY	pdb2l07	1
BxSapB1_1	pdb3hbe	1
Bx_tlp_1_4	pdb2ll8	1
Bx_tlp_1_5	pdb2mh2	1
A0A1I7SCF8_BURXY	pdb5uke	1
Bx_Prx_5	pdb6amv	1
Bx_tlp_1_4	pdb5zau	1
Bx_cpl_3_3	pdb2l0a	1
I0QMH2_9GAMM	pdb6xrg	1
Bx_tlp_1_4	pdb2llf	1
A0A1I7RL37_BURXY	pdb7qcb	1
BxSapB1_1	pdb2m01	1
Bx_tlp_1_3	pdb2mh2	1
Bx_tlp_1_5	pdb6j4i	1
BxATG16_4	pdb7sxb	1
Bx_tlp_1_5	pdb2kw6	1
BxSapB1_1	pdb2mbl	1
Bx_tlp_1_5	pdb2krt	1
BxATG16_4	pdb7mzz	1
cyp_33C9_2	pdb2kl6	1
Bx_cpl_3_3	pdb2l09	1
cyp_33C9_1	pdb6kna	1
BxSapB1_2	pdb2kt8	1
BxATG16_4	pdb5z55	1
Bx_cpl_3_3	pdb5nce	1
Bx_cpl_3_3	pdb2mk2	1
A0A1I7SCF8_BURXY	pdb2mm5	1
I0QYY0_9GAMM	pdb2kpn	1
I0QYY0_9GAMM	pdb7m5t	1
Bx_cpl_3_4	pdb2mbm	1
cyp_33C9_2	pdb2lw4	1
BxSapB1_2	pdb5nce	1
BxCYP33D3_3	pdb8ftw	1
I0QMH2_9GAMM	pdb7kix	1
BxCYP33C4_5	pdb2lni	1
Bx_tlp_1_5	pdb2lze	1
BxSapB1_1	pdb2mv0	1
Bx_tlp_1_4	pdb2kpt	1
Bx_cpl_3_3	pdb2l0d	1
cyp_33C9_1	pdb3sae	1
BxSapB1_1	pdb2lk2	1
Bx_cpl_3_4	pdb5z55	1
BxCYP33C4_5	pdb2m16	1
A0A1I7SCF8_BURXY	pdb2ljw	1
Bx_tlp_1_3	pdb2n69	1
Bx_tlp_1_5	pdb5nce	1
I0QYY0_9GAMM	pdb2l82	1
BxSapB1_1	pdb2kd1	1
A0A1I7SCF8_BURXY	pdb2lk2	1
BxSapB1_1	pdb6pqe	1
A0A1I7SCF8_BURXY	pdb2n75	1
Bx_tlp_1_5	pdb2lfi	1
Bx_tlp_1_4	pdb2kru	1
BxATG16_4	pdb2lni	1
BxCYP33C4_5	pdb2l8v	1
cyp_33C9_1	pdb2l0d	1
cyp_33C9_1	pdb5kp0	1
I0QYY0_9GAMM	pdb2l7q	1
SapB3_5	pdb2ksh	1
Bx_cpl_2_5	2kyq	1
Bx_tlp_1_5	pdb3sdr	1
BxATG16_4	pdb6ppt	1
Bx_tlp_1_3	pdb2lnu	1
cyp_33C9_2	pdb6prj	1
I0QYY0_9GAMM	pdb6cgh	1
BxATG16_3	pdb6xr6	1
I0QYY0_9GAMM	pdb7jyz	1
Bx_tlp_1_3	pdb2ljl	1
cyp_33C9_2	pdb2lk2	1
cyp_33C9_1	pdb6pqe	1
Bx_Prx_5	pdb2lok	1
BxATG16_3	pdb6cgh	1
Bx_tlp_1_5	pdb2mk2	1
Bx_tlp_1_4	pdb2m8x	1
Bx_tlp_1_4	pdb7kix	1
I0QYY0_9GAMM	pdb2lze	1
Bx_tlp_1_5	2kl7	1
BxCYP33C4_5	pdb2l0c	1
BxATG16_4	pdb6xrg	1
I0QMH2_9GAMM	pdb2l3f	1
BxCYP33D3_3	pdb6pq2	1
BxCYP33C9_1	2kcx	1
BxCYP33D3_3	pdb7jyz	1
BxATG16_3	pdb7jyz	1
Bx_cpl_3_4	pdb7qcc	1
cyp_33C9_1	pdb2lcg	1
Bx_tlp_1_3	pdb2kd1	1
BxSapB1_2	pdb2l5q	1
Bx_cpl_3_3	pdb2mry	1
Bx_tlp_1_5	pdb2ljl	1
Bx_Prx_3	pdb7kix	1
Bx_tlp_1_4	pdb2kpn	1
cyp_33C9_1	pdb2lv2	1
BxSapB1_1	pdb6j4i	1
cyp_33C9_2	pdb6xrg	1
Bx_tlp_1_5	pdb2lml	1
BxCYP33D3_3	pdb2ma6	1
BxCYP33C4_5	pdb2lio	1
A0A1I7SCF8_BURXY	2kcx	1
Bx_cpl_3_4	pdb2lnu	1
cyp_33C9_2	pdb7lu8	1
BxSapB1_1	pdb2lmd	1
cyp_33C9_2	pdb2kzv	1
BxATG16_4	pdb2kw6	1
BxSapB1_1	pdb2kt8	1
Bx_tlp_1_3	pdb2kim	1
BxCYP33C4_5	pdb2m01	1
BxATG16_4	pdb2n75	1
Bx_tlp_1_3	pdb2l07	1
SapB3_5	pdb7jyn	1
BxATG16_3	pdb2kl3	1
A0A1I7SCF8_BURXY	2kyq	1
BxATG16_4	pdb5krw	1
cyp_33C9_2	pdb8ftx	1
BxSapB1_1	pdb2l0d	1
Bx_Prx_5	pdb2mh2	1
Bx_tlp_1_3	pdb2kru	1
Bx_cpl_3_3	pdb2mbm	1
BxATG9_5	pdb2mk2	1
BxCYP33D3_3	pdb8ftx	1
BxATG16_3	pdb7mzz	1
Bx_tlp_1_5	pdb2kkq	1
Bx_Prx_5	pdb2lze	1
Bx_Prx_5	pdb6pqe	1
BxCYP33D3_3	2kcx	1
Bx_cpl_3_3	pdb2l82	1
Bx_tlp_1_3	pdb7sxb	1
Bx_tlp_1_5	pdb6o6w	1
Bx_Prx_3	pdb2kt1	1
Bx_cpl_3_1	pdb2mk2	1
BxCYP33C9_1	pdb6xr6	1
Bx_cpl_2_3	pdb6xrg	1
cyp_33C9_2	pdb4lej	1
cyp_33C9_1	pdb2lw4	1
BxCYP33C4_5	pdb2kzx	1
Bx_tlp_1_5	pdb2kpt	1
Bx_tlp_1_3	pdb2m01	1
Bx_tlp_1_4	pdb6pq2	1
BxATG16_4	pdb2lch	1
BxCYP33C9_1	pdb6xry	1
cyp_33C9_1	pdb2ma5	1
BxCYP33D3_3	pdb2kl6	1
SapB3_5	pdb2l07	1
Bx_Prx_5	7mzw	1
cyp_33C9_1	pdb7jyn	1
BxATG9_5	pdb2m16	1
BxCYP33C4_5	pdb7lns	1
Bx_cpl_2_3	pdb7jyn	1
BxSapB1_2	pdb2lx7	1
BxCYP33C9_2	pdb7m5t	1
Bx_tlp_1_3	pdb6ppt	1
I0QYY0_9GAMM	pdb2m16	1
Bx_Prx_5	pdb7mzx	1
BxATG16_4	pdb3sdr	1
Bx_tlp_1_3	pdb6prj	1
cyp_33C9_1	pdb6amw	1
I0QYY0_9GAMM	pdb6amw	1
BxCYP33C4_3	pdb7jyz	1
cyp_33C9_1	pdb2lok	1
BxSapB1_2	pdb6pqe	1
Bx_cpl_3_3	pdb2lze	1
I0QYY0_9GAMM	pdb6ppt	1
SapB3_3	pdb2l07	1
BxCYP33C9_2	pdb2kru	1
A0A1I7SCF8_BURXY	pdb2m8x	1
Bx_Prx_5	pdb6pri	1
I0QYY0_9GAMM	pdb6xry	1
BxCYP33C4_5	pdb6xr7	1
Bx_cpl_3_4	pdb2kl3	1
BxATG16_3	pdb7lu8	1
SapB3_5	pdb2kru	1
I0QYY0_9GAMM	pdb2l3f	1
BxSapB1_1	pdb2loy	1
Bx_cpl_3_4	pdb3sdu	1
cyp_33C9_1	pdb2l08	1
BxATG16_3	pdb6pqm	1
BxATG16_4	pdb6lqz	1
BxCYP33C4_5	pdb2llf	1
BxCYP33D3_3	pdb5z55	1
BxATG16_3	pdb2kkq	1
A0A1I7SCF8_BURXY	pdb3sdu	1
BxCYP33D3_5	pdb2mk2	1
Bx_cpl_3_4	pdb6lqz	1
Bx_cpl_3_4	pdb2kzx	1
BxATG16_3	pdb2lcg	1
Bx_Prx_3	pdb2l07	1
Bx_Prx_5	2kyq	1
SapB3_3	pdb7jyn	1
A0A1I7SCF8_BURXY	pdb2mm6	1
BxCYP33C4_5	pdb2l08	1
BxATG16_3	pdb2kpn	1
Bx_cpl_3_3	pdb2kim	1
cyp_33C9_1	pdb8ftw	1
I0QYY0_9GAMM	pdb5vso	1
BxSapB1_2	pdb2lch	1
BxCYP33C4_5	pdb2kif	1
Bx_tlp_1_5	pdb6prq	1
I0QYY0_9GAMM	pdb2mm5	1
BxSapB1_1	pdb7lns	1
BxATG16_4	pdb2mv0	1
Bx_cpl_3_3	pdb5uke	1
Bx_tlp_1_3	pdb6jxu	1
Bx_cpl_3_1	pdb6xry	1
BxCYP33D3_3	pdb2lcg	1
A0A1I7RL37_BURXY	pdb2ksi	1
cyp_33C9_1	pdb2luz	1
I0QYY0_9GAMM	pdb2lso	1
BxATG16_3	pdb2lmd	1
SapB3_5	2kcx	1
Bx_cpl_3_3	pdb2mm6	1
BxATG16_3	pdb3sdq	1
A0A1I7SCF8_BURXY	pdb2loy	1
SapB3_5	pdb2krt	1
Bx_Prx_5	pdb8ubh	1
Bx_tlp_1_3	pdb2krt	1
Bx_tlp_1_4	pdb2kt1	1
BxCYP33C4_5	pdb3sdr	1
Bx_tlp_1_3	pdb6nzl	1
I0QYY0_9GAMM	pdb5zau	1
BxATG16_3	pdb2kw6	1
A0A1I7SCF8_BURXY	pdb2l9q	1
Bx_cpl_3_3	pdb7jyn	1
Bx_cpl_3_3	pdb3hbd	1
A0A1I7RKM9_BURXY	pdb2mk2	1
Bx_cpl_3_4	pdb2l9q	1
BxCYP33C9_2	pdb2ksi	1
BxCYP33D3_3	pdb2lso	1
BxSapB1_1	pdb6lqz	1
Bx_cpl_3_3	pdb2ma5	1
BxSapB1_2	pdb2l9q	1
cyp_33C9_1	pdb2lek	1
BxSapB1_1	pdb6xry	1
BxATG16_4	pdb2kl3	1
Bx_cpl_3_4	pdb2lcg	1
BxSapB1_2	pdb7m5t	1
BxATG16_4	pdb5uke	1
Bx_cpl_3_4	pdb3sdv	1
I0QYY0_9GAMM	pdb6jxw	1
cyp_33C9_1	pdb4lej	1
BxSapB1_2	pdb2kl3	1
BxATG16_4	pdb2l82	1
Bx_cpl_3_3	pdb2lw4	1
BxCYP33C4_5	pdb2lk2	1
cyp_33C9_2	pdb3sdt	1
BxCYP33D3_3	pdb2lio	1
BxATG16_3	pdb6pqe	1
cyp_33C9_2	pdb2llf	1
A0A1I7SCF8_BURXY	pdb2kl3	1
Bx_cpl_3_4	pdb5zau	1
cyp_33C9_2	2kl7	1
BxSapB1_1	pdb5zau	1
Bx_tlp_1_3	pdb7mzx	1
Bx_tlp_1_4	2lla	1
A0A1I7RL37_BURXY	pdb2lok	1
I0QMH2_9GAMM	pdb6xr6	1
Bx_tlp_1_5	pdb2n3k	1
Bx_tlp_1_4	pdb2kzv	1
Bx_tlp_1_4	pdb2kvo	1
BxATG16_3	pdb2lio	1
Bx_cpl_3_4	pdb2kwb	1
BxSapB1_1	pdb6nu4	1
cyp_33C9_1	pdb2m16	1
Bx_tlp_1_5	pdb2kvo	1
BxCYP33C4_5	pdb2lnu	1
BxCYP33C4_5	pdb2lq3	1
Bx_cpl_3_1	2kcx	1
Bx_tlp_1_3	pdb2kt1	1
I0QMH2_9GAMM	pdb2mh2	1
I0QYY0_9GAMM	pdb6j4i	1
BxATG16_3	pdb7jyn	1
cyp_33C9_2	pdb2l07	1
Bx_cpl_3_4	pdb7jyn	1
BxCYP33C4_5	pdb2l5q	1
BxSapB1_2	pdb2ljl	1
BxATG16_3	pdb6nu4	1
BxCYP33C4_5	pdb2lmd	1
BxSapB1_2	pdb2ksh	1
cyp_33C9_2	pdb2kru	1
BxATG16_4	pdb2l07	1
Bx_cpl_3_4	pdb2m47	1
cyp_33C9_1	pdb2kl6	1
cyp_33C9_1	pdb6j4i	1
BxSapB1_1	2kl7	1
I0QYY0_9GAMM	pdb2lna	1
Bx_tlp_1_5	pdb2ll8	1
BxSapB1_2	pdb7n99	1
I0QYY0_9GAMM	pdb6xr6	1
I0QYY0_9GAMM	pdb2m8x	1
BxCYP33C4_5	pdb2mv0	1
A0A1I7SCF8_BURXY	pdb2kzv	1
BxCYP33D3_3	pdb2kt1	1
A0A1I7RL37_BURXY	pdb2kt1	1
BxSapB1_2	pdb2kct	1
cyp_33C9_2	pdb2lio	1
Bx_tlp_1_5	pdb4lej	1
cyp_33C9_1	pdb2lak	1
Bx_cpl_3_4	pdb7jyz	1
Bx_tlp_1_5	pdb2kzv	1
BxSapB1_2	pdb6jxw	1
BxCYP33D3_3	pdb2kz5	1
Bx_cpl_3_4	pdb2llf	1
BxCYP33C4_5	pdb5nce	1
A0A1I7RKM9_BURXY	2kl7	1
Bx_cpl_3_4	pdb2kzw	1
Bx_cpl_3_3	pdb2n66	1
BxATG16_4	pdb2l05	1
Bx_Prx_5	2kl7	1
Bx_Prx_5	pdb2m16	1
BxATG16_3	pdb2kw2	1
cyp_33C9_2	pdb6pqe	1
Bx_cpl_3_3	pdb7qcb	1
cyp_33C9_2	pdb2kd1	1
Bx_tlp_1_4	pdb2l3f	1
A0A1I7SCF8_BURXY	pdb6pqm	1
Bx_Prx_3	pdb2mk2	1
Bx_tlp_1_3	pdb6xrg	1
I0QYY0_9GAMM	pdb8ubh	1
Bx_cpl_3_3	pdb2lcg	1
BxCYP33C4_5	pdb7knv	1
Bx_cpl_1_5	2kcx	1
A0A1I7SCF8_BURXY	pdb5krw	1
BxSapB1_1	pdb7n99	1
BxATG16_3	pdb2kif	1
BxSapB1_2	pdb8ftw	1
cyp_33C9_2	pdb2l9p	1
cyp_33C9_1	pdb2lx7	1
Bx_tlp_1_5	pdb6cgh	1
Bx_cpl_3_4	pdb7qcb	1
Bx_cpl_2_5	pdb8ubh	1
BxSapB1_1	pdb2lso	1
BxSapB1_1	pdb6xrg	1
BxSapB1_1	pdb5kp0	1
Bx_cpl_3_4	pdb2mm6	1
BxCYP33D3_3	pdb6j4i	1
BxSapB1_1	pdb2kif	1
A0A1I7RL37_BURXY	pdb7knv	1
BxATG16_3	pdb6lqz	1
Bx_tlp_1_3	pdb2l09	1
A0A1I7SCF8_BURXY	pdb7n99	1
Bx_tlp_1_5	pdb2llf	1
Bx_cpl_3_4	pdb2kct	1
Bx_cpl_3_3	pdb3hbh	1
Bx_tlp_1_3	pdb2lak	1
Bx_tlp_1_5	pdb8ftx	1
Bx_Prx_3	pdb2krt	1
BxCYP33C9_2	pdb2lnu	1
I0QYY0_9GAMM	pdb7kix	1
Bx_cpl_3_4	pdb2ll8	1
Bx_cpl_3_3	pdb6prj	1
Bx_tlp_1_4	pdb2kw6	1
Bx_cpl_2_5	pdb6xrg	1
I0QYY0_9GAMM	pdb2ksi	1
BxATG16_4	pdb2lnb	1
BxCYP33D3_5	pdb7jyz	1
cyp_33C9_2	pdb7jyn	1
Bx_Prx_5	pdb2kif	1
BxCYP33C4_5	pdb2l3f	1
I0QYY0_9GAMM	pdb2kif	1
Bx_tlp_1_5	pdb2kru	1
Bx_tlp_1_5	pdb5uke	1
Bx_tlp_1_5	pdb2lgh	1
BxCYP33D3_3	pdb6ppt	1
cyp_33C9_1	pdb7lu8	1
Bx_cpl_3_3	pdb5vso	1
Bx_tlp_1_3	pdb2l08	1
cyp_33C9_5	2kcx	1
cyp_33C9_2	pdb6cgh	1
Bx_tlp_1_3	pdb2lch	1
A0A1I7SCF8_BURXY	pdb2mv0	1
BxATG16_4	pdb2lf2	1
Bx_cpl_3_4	pdb2n69	1
cyp_33C9_2	pdb2kzx	1
Bx_tlp_1_4	pdb2l08	1
BxCYP33D3_3	pdb2kzx	1
BxATG16_4	pdb2lak	1
SapB3_5	pdb2l3f	1
BxCYP33D3_3	pdb2mbm	1
Bx_tlp_1_4	pdb7lns	1
cyp_33C9_2	pdb8ubh	1
I0QYY0_9GAMM	pdb3sae	1
BxSapB1_1	pdb2ljl	1
A0A1I7SCF8_BURXY	pdb2kzw	1
cyp_33C9_1	pdb2l82	1
BxATG16_4	pdb6xr7	1
BxSapB1_1	pdb6prq	1
cyp_33C9_1	pdb6prp	1
BxATG16_3	pdb2lnu	1
BxSapB1_2	pdb2l07	1
Bx_tlp_1_3	pdb6e4j	1
Bx_tlp_1_5	pdb6xr7	1
Bx_tlp_1_4	pdb3hbh	1
A0A1I7SCF8_BURXY	pdb7jyz	1
BxSapB1_2	pdb2lxu	1
Bx_cpl_3_3	pdb6jxu	1
Bx_cpl_3_3	pdb2kw2	1
BxCYP33C4_5	pdb6o6w	1
cyp_33C9_2	pdb2lv2	1
Bx_tlp_1_5	pdb2l07	1
BxATG16_3	pdb5krw	1
Bx_Prx_5	pdb2kpt	1
Bx_tlp_1_5	pdb2kct	1
Bx_tlp_1_5	pdb3sae	1
BxCYP33C4_5	pdb2lcg	1
BxCYP33C4_5	pdb5uke	1
I0QYY0_9GAMM	pdb2kzw	1
BxSapB1_1	pdb2ma5	1
Bx_tlp_1_4	pdb6pqe	1
BxCYP33D3_3	pdb2mk2	1
Bx_tlp_1_3	pdb2l82	1
BxCYP33D3_3	pdb2m47	1
cyp_33C9_1	pdb2lf2	1
SapB3_3	pdb2kt1	1
Bx_tlp_1_4	pdb2kwb	1
Bx_cpl_3_1	pdb6xr7	1
Bx_cpl_3_3	pdb2n3k	1
A0A1I7RKM9_BURXY	pdb6xrg	1
BxCYP33D3_3	pdb2lak	1
BxSapB1_1	2lla	1
Bx_tlp_1_3	pdb2kz5	1
cyp_33C9_2	pdb2lak	1
BxSapB1_2	pdb5zau	1
I0QYY0_9GAMM	pdb2mh2	1
BxCYP33C4_5	pdb2kt1	1
Bx_cpl_3_3	pdb4lej	1
BxSapB1_2	pdb2kpt	1
Bx_tlp_1_3	pdb2ll8	1
Bx_tlp_1_3	pdb3sdu	1
BxATG16_4	pdb2kvo	1
Bx_cpl_3_3	2kcx	1
cyp_33C9_2	pdb5ks6	1
BxCYP33D3_3	pdb2l9q	1
BxCYP33C4_5	pdb6pqm	1
Bx_tlp_1_5	pdb6amv	1
Bx_cpl_3_4	pdb2kif	1
BxCYP33D3_3	pdb2lek	1
BxCYP33D3_3	pdb2n66	1
Bx_tlp_1_5	pdb7kix	1
BxCYP33C4_5	pdb2loy	1
Bx_Prx_5	pdb7knv	1
Bx_cpl_3_3	pdb7qcc	1
BxCYP33D3_3	pdb6amw	1
Bx_tlp_1_5	pdb7qcc	1
BxCYP33C4_5	pdb5kp0	1
I0QYY0_9GAMM	pdb6o6w	1
BxATG16_4	pdb2mry	1
A0A1I7RL37_BURXY	pdb8ftw	1
BxCYP33C9_2	pdb2l07	1
Bx_cpl_3_4	pdb6prp	1
Bx_tlp_1_4	pdb2nbn	1
Bx_tlp_1_4	pdb2n69	1
Bx_cpl_3_3	pdb2kw6	1
BxSapB1_2	pdb2kw2	1
BxSapB1_1	2kyq	1
BxATG16_4	pdb2kzw	1
BxCYP33C4_5	pdb7x5c	1
cyp_33C9_2	pdb2ma5	1
BxSapB1_1	pdb2lek	1
BxCYP33C9_2	pdb2kt1	1
cyp_33C9_1	pdb6prj	1
Bx_tlp_1_3	pdb2l5q	1
BxCYP33D3_3	pdb3sdq	1
Bx_tlp_1_3	pdb7knv	1
Bx_cpl_3_3	pdb8ftw	1
Bx_cpl_3_4	pdb2lf2	1
Bx_cpl_2_5	pdb2m16	1
I0QYY0_9GAMM	pdb3hbe	1
cyp_33C9_2	pdb2lna	1
BxATG16_4	pdb2lmd	1
cyp_33C9_2	pdb7qcc	1
BxCYP33C4_5	pdb2n69	1
Bx_cpl_3_4	pdb6amv	1
I0QMH2_9GAMM	pdb8ftx	1
Bx_cpl_3_3	pdb2n69	1
BxCYP33C9_1	pdb2l07	1
Bx_cpl_3_3	pdb7m5t	1
Bx_tlp_1_5	pdb3hbe	1
BxCYP33D3_3	pdb2m01	1
A0A1I7SCF8_BURXY	7mzw	1
Bx_tlp_1_5	pdb2m01	1
Bx_Prx_5	pdb2kw2	1
A0A1I7SCF8_BURXY	pdb2lml	1
BxSapB1_1	pdb6prj	1
BxATG16_3	pdb3sae	1
Bx_Prx_5	pdb6cgh	1
cyp_33C9_2	pdb2lnb	1
Bx_tlp_1_5	pdb6kna	1
Bx_cpl_3_4	pdb7lns	1
Bx_tlp_1_4	pdb6xr7	1
Bx_tlp_1_4	pdb2mv0	1
cyp_33C9_2	pdb2m01	1
Bx_tlp_1_3	pdb2n3k	1
BxATG16_4	pdb3sae	1
BxCYP33C9_2	pdb2l5q	1
Bx_tlp_1_5	pdb2lok	1
BxSapB1_2	pdb2kt1	1
Bx_Prx_3	pdb6xry	1
Bx_tlp_1_5	pdb2l9p	1
Bx_tlp_1_4	pdb2ma6	1
cyp_33C9_1	pdb7knv	1
I0QMH2_9GAMM	2kyq	1
BxSapB1_1	pdb6e4j	1
I0QYY0_9GAMM	pdb2lq3	1
SapB3_3	pdb6xry	1
Bx_cpl_2_5	2kl7	1
cyp_33C9_1	pdb7x5c	1
BxATG16_4	2lla	1
cyp_33C9_1	pdb6pri	1
Bx_tlp_1_5	pdb2l82	1
Bx_tlp_1_3	pdb2lnb	1
cyp_33C9_2	pdb7kix	1
BxSapB1_1	pdb2kpm	1
BxCYP33C4_5	pdb2mh2	1
BxCYP33D3_3	pdb2lgh	1
Bx_Prx_5	pdb7jyn	1
Bx_tlp_1_4	2kcx	1
BxATG16_3	pdb5zau	1
Bx_tlp_1_5	pdb2lni	1
BxCYP33D3_3	pdb2l82	1
BxSapB1_1	pdb2lok	1
cyp_33C9_2	pdb6j4i	1
A0A1I7SCF8_BURXY	pdb2l8v	1
Bx_Prx_3	pdb6xrg	1
BxSapB1_1	pdb6amw	1
Bx_tlp_1_4	pdb3hbe	1
Bx_tlp_1_4	pdb2lml	1
I0QYY0_9GAMM	pdb2l05	1
BxCYP33C4_5	pdb2l9p	1
BxSapB1_2	2kl7	1
BxSapB1_1	pdb2lgh	1
BxATG16_3	pdb6prq	1
I0QYY0_9GAMM	pdb5z55	1
Bx_Prx_5	pdb5ks6	1
BxSapB1_1	pdb2l05	1
BxATG16_4	pdb7jyz	1
Bx_Prx_5	pdb7jyz	1
BxSapB1_2	pdb2kif	1
Bx_cpl_2_5	pdb2l07	1
BxATG16_4	pdb2lx7	1
cyp_33C9_1	pdb2lfi	1
Bx_tlp_1_4	pdb2lna	1
I0QYY0_9GAMM	pdb7lns	1
Bx_cpl_3_4	pdb7knv	1
Bx_cpl_3_3	pdb2mbl	1
Bx_tlp_1_3	pdb3hbd	1
BxSapB1_2	pdb6kna	1
A0A1I7SCF8_BURXY	pdb6ppt	1
BxCYP33C4_5	pdb2kt7	1
A0A1I7SCF8_BURXY	pdb6xr7	1
cyp_33C9_1	pdb2ljw	1
Bx_cpl_3_4	pdb2lq3	1
I0QYY0_9GAMM	pdb2mbl	1
BxATG16_4	pdb2kw2	1
BxCYP33D3_3	pdb2lok	1
I0QYY0_9GAMM	pdb3sdt	1
Bx_cpl_3_4	pdb2l5q	1
Bx_tlp_1_4	pdb2lgh	1
A0A1I7RL37_BURXY	pdb7jyz	1
cyp_33C9_3	pdb6xr7	1
cyp_33C9_2	pdb7n99	1
Bx_Prx_5	pdb3sdu	1
BxATG16_3	pdb2ll8	1
BxCYP33D3_3	pdb2m8x	1
Bx_Prx_5	pdb3sdr	1
Bx_tlp_1_4	pdb2n75	1
I0QMH2_9GAMM	pdb8ubh	1
cyp_33C9_2	pdb2kt8	1
BxATG16_3	pdb2lnb	1
BxCYP33D3_3	pdb6nzl	1
Bx_tlp_1_5	pdb2l5q	1
cyp_33C9_2	pdb6jxu	1
I0QMH2_9GAMM	pdb2m16	1
BxSapB1_1	pdb3sdu	1
BxATG16_3	pdb6amv	1
cyp_33C9_1	pdb2mk2	1
cyp_33C9_2	pdb2lf2	1
cyp_33C9_2	pdb2nbn	1
BxCYP33C4_5	pdb6j4i	1
SapB3_5	pdb2m16	1
BxSapB1_2	pdb2luz	1
Bx_tlp_1_4	pdb2l09	1
cyp_33C9_2	pdb2ljl	1
cyp_33C9_2	pdb2ljw	1
Bx_Prx_5	pdb2l07	1
Bx_tlp_1_3	pdb3hbe	1
Bx_tlp_1_5	pdb3hbd	1
I0QYY0_9GAMM	pdb6pq2	1
BxSapB1_1	pdb2lcg	1
Bx_cpl_3_4	pdb2lml	1
Bx_tlp_1_5	pdb7x5c	1
cyp_33C9_1	pdb3sdu	1
cyp_33C9_1	pdb2llf	1
cyp_33C9_1	2kl7	1
Bx_tlp_1_4	pdb2lq3	1
BxCYP33C4_5	pdb2l0d	1
BxATG9_5	pdb6xry	1
A0A1I7SCF8_BURXY	pdb7m5t	1
BxCYP33D3_3	pdb2n3k	1
cyp_33C9_2	pdb2kl3	1
BxATG16_3	pdb2m01	1
BxCYP33D3_3	pdb2lfi	1
BxSapB1_1	pdb2n69	1
A0A1I7RKM9_BURXY	pdb7kix	1
Bx_tlp_1_5	pdb2ma6	1
BxCYP33D3_3	pdb6xr7	1
BxSapB1_1	pdb2lnu	1
BxSapB1_2	pdb4lej	1
Bx_cpl_3_3	pdb2ljl	1
cyp_33C9_2	pdb2l3f	1
BxATG16_4	pdb2kkq	1
A0A1I7RL37_BURXY	pdb2m16	1
A0A1I7SCF8_BURXY	pdb2kvo	1
BxATG16_4	pdb6xry	1
I0QYY0_9GAMM	pdb7mzz	1
Bx_cpl_3_4	pdb2lni	1
BxATG16_3	pdb3sdr	1
cyp_33C9_2	pdb2mm5	1
A0A1I7SCF8_BURXY	pdb2ma6	1
Bx_cpl_3_3	pdb2kif	1
BxATG16_3	pdb6kna	1
Bx_cpl_3_3	pdb2kpt	1
BxATG16_4	pdb3sdq	1
I0QYY0_9GAMM	pdb2nbn	1
cyp_33C9_2	pdb6pqm	1
BxATG16_4	pdb5kp0	1
BxATG16_4	pdb2lok	1
BxATG16_3	pdb2kt8	1
cyp_33C9_1	pdb6pqm	1
cyp_33C9_1	pdb2kru	1
Bx_cpl_3_3	pdb7jyz	1
I0QMH2_9GAMM	pdb7jyz	1
BxSapB1_1	pdb2l07	1
Bx_cpl_3_4	pdb2nbn	1
A0A1I7RKM9_BURXY	7mzw	1
A0A1I7SCF8_BURXY	pdb2mk2	1
A0A1I7SCF8_BURXY	pdb6kna	1
BxSapB1_2	pdb2l0c	1
BxATG16_4	pdb5ks6	1
Bx_cpl_3_4	pdb2kt8	1
cyp_33C9_1	pdb2l07	1
cyp_33C9_2	pdb2lcg	1
Bx_cpl_3_3	pdb2kwb	1
Bx_tlp_1_5	pdb2loy	1
Bx_cpl_3_4	pdb2l05	1
Bx_tlp_1_3	pdb2kvo	1
Bx_cpl_3_3	pdb7sxb	1
A0A1I7SCF8_BURXY	pdb2kzx	1
BxCYP33C4_5	pdb6amv	1
A0A1I7RL37_BURXY	2kcx	1
Bx_cpl_3_4	pdb6pqm	1
BxCYP33D3_3	pdb2lq3	1
Bx_Prx_5	pdb7kix	1
BxCYP33C4_5	pdb2ltl	1
I0QYY0_9GAMM	pdb7wcg	1
Bx_cpl_3_4	pdb2l0c	1
Bx_tlp_1_5	pdb8ubh	1
cyp_33C9_1	pdb2kt1	1
I0QYY0_9GAMM	pdb2luz	1
Bx_cpl_2_4	pdb7jyn	1
Bx_tlp_1_4	pdb2kkq	1
BxATG16_3	pdb2loy	1
BxATG16_3	pdb8ftx	1
BxSapB1_1	pdb2l9p	1
Bx_tlp_1_5	pdb3sdv	1
BxCYP33C4_5	pdb2kkq	1
BxCYP33C4_5	pdb6xr6	1
Bx_tlp_1_5	pdb2lq3	1
BxATG16_4	pdb2kt1	1
Bx_cpl_3_4	pdb2lok	1
BxATG16_3	pdb6e4j	1
Bx_tlp_1_4	pdb2l9p	1
BxCYP33C4_5	pdb3sae	1
I0QYY0_9GAMM	pdb3hbh	1
Bx_cpl_3_4	pdb2ltl	1
BxCYP33C9_2	pdb8ftw	1
BxSapB1_2	pdb2llf	1
Bx_cpl_3_3	pdb2l5q	1
BxATG16_3	pdb2mv0	1
A0A1I7SCF8_BURXY	pdb7qcc	1
A0A1I7SCF8_BURXY	pdb2lok	1
BxSapB1_2	pdb3hbh	1
Bx_tlp_1_3	pdb3sdr	1
SapB3_3	pdb2kwb	1
BxATG9_5	pdb2kt1	1
Bx_tlp_1_3	pdb2mm5	1
BxCYP33C4_5	pdb6lqz	1
BxCYP33C4_5	pdb2kvo	1
BxSapB1_1	pdb6pri	1
A0A1I7SCF8_BURXY	pdb7knv	1
Bx_tlp_1_5	pdb2ljw	1
A0A1I7SCF8_BURXY	pdb6xry	1
Bx_cpl_2_3	2kyq	1
cyp_33C9_2	pdb6nzl	1
Bx_tlp_1_4	pdb2lf2	1
I0QYY0_9GAMM	pdb2lw4	1
cyp_33C9_1	pdb2n66	1
Bx_cpl_3_3	pdb2lf2	1
cyp_33C9_5	2kyq	1
BxATG16_4	pdb2kt8	1
BxCYP33C4_5	pdb2ma5	1
Bx_cpl_3_4	pdb3hbh	1
BxCYP33D3_3	pdb2n76	1
BxSapB1_2	pdb2l0a	1
BxATG16_3	pdb2m47	1
I0QYY0_9GAMM	pdb6prj	1
cyp_33C9_1	pdb2kct	1
Bx_cpl_3_3	pdb7lu8	1
Bx_tlp_1_4	pdb2lak	1
BxATG16_3	pdb2lch	1
Bx_tlp_1_5	pdb3sdt	1
Bx_cpl_3_3	pdb5zau	1
cyp_33C9_1	pdb2m8x	1
BxCYP33D3_3	pdb2ltl	1
Bx_tlp_1_4	pdb5kp0	1
I0QYY0_9GAMM	pdb2l09	1
Bx_tlp_1_3	2kcx	1
Bx_tlp_1_4	pdb6amw	1
Bx_cpl_3_4	pdb6e4j	1
Bx_tlp_1_4	pdb2kl6	1
BxCYP33D3_3	pdb7jyn	1
A0A1I7SCF8_BURXY	pdb6nzl	1
BxATG16_4	pdb2l0c	1
Bx_tlp_1_5	pdb5vso	1
BxSapB1_1	pdb3sae	1
Bx_tlp_1_5	7mzw	1
Bx_cpl_3_3	pdb2l08	1
cyp_33C9_2	pdb8ftw	1
Bx_tlp_1_3	2kyq	1
A0A1I7SCF8_BURXY	pdb7x5c	1
BxCYP33D3_3	pdb2kt8	1
Bx_cpl_3_4	pdb2lze	1
A0A1I7RKM9_BURXY	2lla	1
Bx_cpl_3_4	pdb2lna	1
BxSapB1_1	pdb5z55	1
A0A1I7SCF8_BURXY	pdb2l0a	1
A0A1I7SCF8_BURXY	pdb2lni	1
BxCYP33D3_3	pdb7qcb	1
Bx_cpl_3_4	pdb4lej	1
cyp_33C9_2	pdb2lch	1
Bx_cpl_3_4	pdb2kpt	1
Bx_tlp_1_5	pdb6pqm	1
BxATG16_3	pdb7x5c	1
Bx_cpl_3_3	pdb2lmd	1
Bx_tlp_1_4	pdb2lze	1
Bx_tlp_1_3	pdb2kw6	1
SapB3_3	pdb2kru	1
Bx_tlp_1_4	pdb3hbd	1
I0QYY0_9GAMM	pdb7lu8	1
cyp_33C9_1	pdb2nbn	1
Bx_tlp_1_3	pdb5zau	1
Bx_tlp_1_4	pdb2n66	1
Bx_Prx_5	pdb2l9p	1
BxSapB1_1	pdb2kw2	1
Bx_tlp_1_3	pdb2lok	1
SapB3_5	pdb6xr6	1
Bx_tlp_1_5	pdb2lk2	1
BxCYP33C9_2	pdb6xr7	1
BxATG16_4	2kl7	1
Bx_cpl_3_3	pdb2l7q	1
Bx_cpl_3_3	pdb2kz5	1
BxATG16_3	pdb3hbe	1
Bx_tlp_1_4	pdb6kna	1
cyp_33C9_1	2kyq	1
BxATG16_3	pdb8ubh	1
BxSapB1_1	pdb3sdt	1
Bx_tlp_1_5	pdb2kl3	1
Bx_tlp_1_4	pdb7jyn	1
Bx_tlp_1_3	pdb2lna	1
BxCYP33D3_3	pdb2lch	1
BxCYP33C4_5	pdb2kru	1
Bx_cpl_3_4	pdb3hbd	1
cyp_33C9_2	pdb7mzz	1
cyp_33C9_1	7mzw	1
BxATG16_4	pdb7jyn	1
A0A1I7RL37_BURXY	pdb2mk2	1
Bx_tlp_1_3	pdb2l3f	1
Bx_cpl_3_3	pdb2lni	1
Bx_cpl_3_4	pdb2l7q	1
Bx_cpl_3_3	pdb2lq3	1
BxATG16_3	pdb2lok	1
BxSapB1_1	pdb2lx7	1
I0QYY0_9GAMM	pdb2n69	1
BxATG16_4	pdb2kpn	1
Bx_cpl_3_3	pdb6kna	1
Bx_cpl_3_1	2kyq	1
Bx_tlp_1_4	pdb6j4i	1
BxCYP33D3_3	pdb7x5c	1
Bx_cpl_2_3	pdb7jyz	1
BxSapB1_1	pdb2lq3	1
BxSapB1_2	pdb2lv2	1
cyp_33C9_1	pdb2l9p	1
BxATG16_3	pdb2kzw	1
A0A1I7RL37_BURXY	pdb8ftx	1
BxCYP33D3_3	pdb5zau	1
Bx_tlp_1_3	pdb2l7q	1
BxCYP33C4_5	pdb6pq2	1
BxSapB1_2	pdb2loy	1
A0A1I7SCF8_BURXY	pdb6xrg	1
I0QYY0_9GAMM	pdb6pqm	1
BxCYP33D3_3	pdb3sdu	1
Bx_Prx_5	pdb6prq	1
Bx_Prx_5	pdb5zau	1
A0A1I7RKM9_BURXY	pdb2l3f	1
Bx_cpl_3_3	pdb6cgh	1
A0A1I7SCF8_BURXY	pdb6pqe	1
BxCYP33C4_5	pdb2lgh	1
Bx_tlp_1_3	pdb2l0c	1
A0A1I7SCF8_BURXY	pdb2ksh	1
Bx_tlp_1_5	pdb2lmd	1
BxCYP33C4_5	pdb2ksh	1
BxSapB1_1	pdb6ppt	1
BxCYP33C4_5	pdb2kw6	1
A0A1I7SCF8_BURXY	pdb6jxw	1
BxCYP33D3_3	pdb8ubh	1
cyp_33C9_2	pdb5z55	1
Bx_tlp_1_4	pdb2kd1	1
Bx_tlp_1_5	pdb2mry	1
BxSapB1_1	pdb2lxu	1
BxSapB1_1	pdb2kz5	1
Bx_cpl_3_3	pdb3sae	1
Bx_cpl_3_3	pdb2kl3	1
BxSapB1_1	pdb2kl6	1
Bx_tlp_1_3	pdb2mv0	1
BxCYP33C9_2	pdb2lni	1
I0QYY0_9GAMM	pdb2mry	1
BxCYP33D3_3	pdb3sdr	1
BxATG16_4	pdb6nu4	1
Bx_cpl_3_3	pdb2lml	1
cyp_33C9_1	pdb2l3f	1
BxATG16_3	pdb2ksi	1
Bx_tlp_1_4	pdb7jyz	1
Bx_tlp_1_3	pdb5uke	1
BxSapB1_1	pdb2ll8	1
BxSapB1_1	pdb2l5q	1
I0QYY0_9GAMM	pdb2l9q	1
BxCYP33D3_3	pdb6pri	1
cyp_33C9_2	pdb2m47	1
Bx_tlp_1_3	pdb2mbm	1
BxATG16_4	pdb6jxu	1
cyp_33C9_2	7mzw	1
BxCYP33D3_3	pdb6pqm	1
Bx_tlp_1_3	pdb2lgh	1
Bx_cpl_3_3	pdb2lxu	1
A0A1I7SCF8_BURXY	pdb7sxb	1
cyp_33C9_1	pdb3sdr	1
BxSapB1_2	pdb2kim	1
Bx_Prx_5	pdb2l3f	1
A0A1I7RL37_BURXY	pdb7kix	1
BxCYP33C4_5	pdb3sdt	1
I0QMH2_9GAMM	pdb6xry	1
Bx_cpl_3_3	pdb2kzx	1
BxATG9_5	7mzw	1
BxCYP33C4_5	pdb2l82	1
Bx_tlp_1_4	pdb5vso	1
BxATG16_3	pdb7lns	1
Bx_tlp_1_4	pdb6pri	1
I0QMH2_9GAMM	pdb2ksh	1
Bx_cpl_2_4	pdb7jyz	1
Bx_tlp_1_5	pdb2mm6	1
BxCYP33C4_5	pdb2lch	1
cyp_33C9_2	pdb2l09	1
BxATG16_3	pdb2n75	1
Bx_tlp_1_4	pdb7knv	1
cyp_33C9_1	pdb2kl3	1
BxCYP33D3_3	2lla	1
Bx_tlp_1_4	pdb3sdu	1
BxATG16_4	pdb8ubh	1
Bx_tlp_1_5	2kcx	1
BxATG16_3	pdb7knv	1
Bx_tlp_1_4	pdb2m16	1
BxSapB1_2	pdb2kpm	1
BxCYP33C4_5	pdb7qcb	1
Bx_cpl_3_4	pdb2kvo	1
BxATG16_4	pdb2l9p	1
BxSapB1_2	pdb2l3f	1
BxATG9_5	pdb8ubh	1
BxSapB1_1	pdb5uke	1
BxCYP33D3_3	pdb6xrg	1
BxATG16_3	pdb2l09	1
cyp_33C9_2	pdb2mbm	1
cyp_33C9_1	2kcx	1
Bx_cpl_3_3	pdb6amv	1
BxCYP33C4_5	pdb2ma6	1
I0QYY0_9GAMM	7mzw	1
A0A1I7RKM9_BURXY	2kyq	1
BxATG16_4	pdb2n69	1
BxSapB1_1	pdb2kvo	1
BxATG16_4	pdb6pri	1
Bx_cpl_2_2	2kcx	1
SapB3_5	pdb8ftw	1
BxCYP33C4_5	pdb6e4j	1
A0A1I7SCF8_BURXY	pdb3sdv	1
Bx_cpl_3_3	pdb2lak	1
Bx_tlp_1_3	pdb2m47	1
A0A1I7SCF8_BURXY	pdb2lak	1
BxCYP33C9_2	pdb2m16	1
cyp_33C9_2	pdb7mzx	1
BxATG16_3	pdb6xry	1
A0A1I7SCF8_BURXY	pdb5kp0	1
BxATG16_3	pdb3sdu	1
BxCYP33C4_5	pdb3hbh	1
Bx_cpl_3_4	pdb2ma5	1
Bx_tlp_1_3	pdb2l8v	1
I0QYY0_9GAMM	pdb2kt1	1
cyp_33C9_2	pdb7x5c	1
BxCYP33D3_3	pdb2kpm	1
Bx_tlp_1_3	pdb7n99	1
BxCYP33D3_3	pdb2l9p	1
Bx_tlp_1_3	2lla	1
BxSapB1_2	pdb2m01	1
BxSapB1_1	pdb2l0a	1
BxSapB1_2	pdb6prj	1
Bx_cpl_3_4	pdb2krt	1
BxSapB1_2	pdb2lna	1
A0A1I7RKM9_BURXY	pdb2ksh	1
Bx_cpl_3_4	pdb2n76	1
cyp_33C9_1	pdb2l0a	1
cyp_33C9_2	pdb6prp	1
BxCYP33C4_5	2lla	1
Bx_tlp_1_4	pdb3sdt	1
cyp_33C9_1	pdb6jxw	1
BxCYP33C4_5	pdb2lze	1
Bx_Prx_5	pdb2lch	1
BxSapB1_1	pdb6prp	1
Bx_Prx_5	pdb2krt	1
BxCYP33D3_3	pdb4lej	1
BxATG16_4	pdb3hbd	1
BxCYP33C9_2	pdb2l7q	1
I0QYY0_9GAMM	pdb2kpt	1
Bx_cpl_3_3	pdb2lso	1
cyp_33C9_2	pdb7qcb	1
cyp_33C9_1	pdb7kix	1
SapB3_3	pdb8ftw	1
BxSapB1_2	pdb2lnb	1
BxCYP33D3_3	pdb2ksi	1
BxATG16_3	pdb2ma6	1
A0A1I7RL37_BURXY	pdb7lu8	1
BxSapB1_1	pdb2mm6	1
BxATG16_4	pdb2kzv	1
Bx_tlp_1_5	pdb2kt1	1
Bx_Prx_5	pdb2lni	1
A0A1I7SCF8_BURXY	pdb2l5q	1
cyp_33C9_1	pdb7n99	1
BxCYP33C9_1	pdb7jyn	1
cyp_33C9_2	pdb2kwb	1
BxSapB1_1	pdb2lv2	1
cyp_33C9_1	pdb6xry	1
BxCYP33D3_3	pdb2kd1	1
BxCYP33C4_5	pdb7lu8	1
A0A1I7SCF8_BURXY	2lla	1
cyp_33C9_1	pdb2l7q	1
BxCYP33C4_5	pdb2lw4	1
A0A1I7SCF8_BURXY	pdb3hbe	1
Bx_tlp_1_3	pdb5z55	1
BxCYP33C4_5	pdb2lek	1
BxSapB1_2	pdb8ftx	1
Bx_cpl_3_4	pdb2l9p	1
BxATG16_3	pdb2krt	1
Bx_cpl_3_3	pdb2ma6	1
Bx_cpl_3_4	pdb6ppt	1
cyp_33C9_1	pdb2kzv	1
Bx_tlp_1_5	pdb6prj	1
I0QYY0_9GAMM	pdb2kim	1
Bx_Prx_5	pdb8ftx	1
BxSapB1_1	pdb2kct	1
Bx_tlp_1_3	pdb2lso	1
I0QYY0_9GAMM	pdb2kz5	1
I0QYY0_9GAMM	pdb2mbm	1
A0A1I7SCF8_BURXY	pdb6j4i	1
cyp_33C9_4	2kcx	1
Bx_cpl_3_4	pdb7wcg	1
A0A1I7SCF8_BURXY	pdb6jxu	1
BxCYP33C4_5	pdb2mbm	1
Bx_cpl_3_4	pdb6nu4	1
Bx_cpl_3_3	2kl7	1
A0A1I7RL37_BURXY	pdb6xr6	1
BxCYP33D3_3	pdb2lni	1
BxSapB1_2	pdb7mzz	1
A0A1I7SCF8_BURXY	pdb2llf	1
A0A1I7RL37_BURXY	pdb3sdu	1
BxSapB1_1	pdb3sdq	1
Bx_Prx_5	pdb6xrg	1
BxCYP33C4_3	2kcx	1
I0QYY0_9GAMM	pdb8ftx	1
Bx_tlp_1_5	pdb2lx7	1
Bx_tlp_1_3	pdb2ksh	1
Bx_tlp_1_3	pdb3hbh	1
Bx_tlp_1_5	pdb7mzz	1
I0QYY0_9GAMM	pdb6e4j	1
Bx_cpl_3_4	pdb2n66	1
Bx_Prx_5	pdb2ljl	1
BxCYP33C4_5	pdb2kl6	1
Bx_cpl_3_3	pdb6nzl	1
BxATG16_4	pdb2m16	1
BxATG16_3	pdb2lk2	1
Bx_cpl_3_3	pdb3sdt	1
Bx_cpl_3_3	2lla	1
Bx_tlp_1_5	pdb2kz5	1
BxSapB1_2	pdb6jxu	1
Bx_tlp_1_3	pdb2lfi	1
BxATG16_3	pdb2kwb	1
BxATG16_3	pdb2kd1	1
Bx_Prx_5	pdb7mzz	1
Bx_cpl_3_3	pdb7wcg	1
Bx_tlp_1_5	pdb2l08	1
I0QYY0_9GAMM	pdb6pri	1
A0A1I7RKM9_BURXY	pdb2kt1	1
BxCYP33D3_3	pdb2kpt	1
SapB3_3	pdb2m16	1
BxSapB1_1	pdb2l7q	1
Bx_cpl_3_3	pdb2kvo	1
Bx_cpl_3_4	pdb2lv2	1
A0A1I7SCF8_BURXY	pdb2lnu	1
cyp_33C9_2	pdb2ll8	1
cyp_33C9_2	pdb6e4j	1
BxATG16_3	pdb2llf	1
BxCYP33C4_5	pdb2kwb	1
Bx_tlp_1_4	pdb2kim	1
Bx_tlp_1_3	pdb2kl3	1
Bx_tlp_1_5	pdb2ksi	1
BxSapB1_2	pdb2kwb	1
BxCYP33D3_3	pdb2kwb	1
cyp_33C9_2	pdb2lml	1
BxATG16_3	pdb6jxu	1
BxCYP33D3_3	pdb6o6w	1
BxSapB1_1	pdb2kl3	1
Bx_Prx_5	pdb2lek	1
BxCYP33C9_1	pdb6xrg	1
BxCYP33D3_3	pdb2lw4	1
cyp_33C9_1	pdb2ksi	1
Bx_cpl_3_4	pdb2kz5	1
BxATG16_4	pdb2m8x	1
BxSapB1_1	pdb2lio	1
Bx_Prx_5	pdb6xr7	1
BxCYP33C4_5	pdb2kct	1
BxSapB1_2	pdb6cgh	1
BxATG9_5	pdb2ksi	1
SapB3_3	2kl7	1
SapB3_5	pdb2kt1	1
BxSapB1_2	pdb2lf2	1
Bx_tlp_1_5	pdb2n69	1
Bx_tlp_1_4	pdb2kzw	1
BxSapB1_1	pdb2lna	1
Bx_tlp_1_4	pdb8ftx	1
cyp_33C9_1	pdb2kim	1
SapB3_3	7mzw	1
I0QYY0_9GAMM	pdb2kd1	1
Bx_tlp_1_4	pdb6xrg	1
A0A1I7RL37_BURXY	2kl7	1
Bx_tlp_1_5	pdb2kw2	1
cyp_33C9_5	pdb6xrg	1
BxCYP33D3_3	pdb3hbe	1
Bx_tlp_1_3	pdb2kpn	1
Bx_tlp_1_5	pdb2l05	1
BxATG16_3	pdb2kl6	1
cyp_33C9_2	pdb2n76	1
cyp_33C9_2	pdb2lni	1
Bx_tlp_1_5	pdb6ppt	1
Bx_tlp_1_3	pdb8ftx	1
Bx_cpl_3_4	pdb3sdq	1
BxATG16_4	pdb2n66	1
A0A1I7SCF8_BURXY	pdb8ftw	1
Bx_tlp_1_5	pdb2ma5	1
BxATG16_4	pdb7lns	1
Bx_tlp_1_4	pdb6nu4	1
cyp_33C9_2	pdb2kct	1
BxATG16_3	pdb2n76	1
cyp_33C9_2	pdb7m5t	1
Bx_Prx_5	pdb2kzx	1
I0QYY0_9GAMM	pdb2mm6	1
Bx_tlp_1_3	pdb2mry	1
A0A1I7RL37_BURXY	pdb8ubh	1
Bx_Prx_5	pdb7n99	1
A0A1I7SCF8_BURXY	pdb6e4j	1
cyp_33C9_1	pdb3hbh	1
BxSapB1_1	pdb5ks6	1
BxCYP33C4_5	pdb2n76	1
BxSapB1_1	pdb2kt7	1
I0QYY0_9GAMM	pdb3sdr	1
Bx_tlp_1_4	pdb2l0c	1
A0A1I7SCF8_BURXY	pdb2lq3	1
cyp_33C9_2	pdb2n3k	1
BxATG16_3	pdb2m16	1
Bx_tlp_1_4	pdb2m01	1
Bx_tlp_1_3	pdb2mk2	1
A0A1I7SCF8_BURXY	pdb2n76	1
Bx_cpl_3_4	pdb7m5t	1
Bx_Prx_5	pdb2kpn	1
BxSapB1_2	pdb2lnu	1
BxSapB1_1	pdb2nbn	1
I0QYY0_9GAMM	pdb2mk2	1
BxSapB1_2	pdb6prq	1
Bx_cpl_3_4	pdb2lch	1
cyp_33C9_2	pdb2l05	1
Bx_cpl_3_4	pdb2lso	1
Bx_tlp_1_4	pdb2n3k	1
Bx_cpl_3_1	pdb6xrg	1
Bx_cpl_2_5	2kcx	1
BxATG16_4	pdb2kpm	1
cyp_33C9_2	pdb3hbd	1
Bx_cpl_3_4	2lla	1
Bx_tlp_1_3	pdb2lek	1
BxCYP33C4_5	pdb8ftw	1
cyp_33C9_1	pdb8ftx	1
BxATG16_4	pdb5zau	1
BxCYP33D3_3	2kyq	1
Bx_cpl_2_5	pdb6xry	1
A0A1I7SCF8_BURXY	pdb2lgh	1
I0QYY0_9GAMM	pdb2l8v	1
Bx_tlp_1_4	pdb2lk2	1
BxSapB1_1	pdb2ltl	1
Bx_cpl_2_2	2kyq	1
I0QMH2_9GAMM	pdb8ftw	1
BxCYP33C4_5	pdb7n99	1
cyp_33C9_2	pdb7sxb	1
Bx_tlp_1_3	pdb2ksi	1
Bx_cpl_3_3	pdb2l07	1
Bx_cpl_3_4	pdb6pqe	1
BxCYP33C4_5	pdb2l9q	1
Bx_cpl_3_4	pdb2loy	1
Bx_tlp_1_5	pdb5zau	1
BxSapB1_2	pdb2ll8	1
Bx_cpl_3_3	pdb2l9p	1
Bx_tlp_1_5	pdb2kzw	1
I0QYY0_9GAMM	pdb6xr7	1
BxCYP33C4_5	pdb7qcc	1
cyp_33C9_2	pdb2loy	1
BxCYP33C4_5	pdb5zau	1
cyp_33C9_2	pdb2lok	1
SapB3_3	pdb6xrg	1
cyp_33C9_2	pdb6jxw	1
I0QMH2_9GAMM	pdb2mk2	1
Bx_tlp_1_3	pdb6pqe	1
BxATG16_4	pdb6prp	1
BxCYP33D3_3	pdb7wcg	1
Bx_cpl_3_3	pdb2kru	1
I0QYY0_9GAMM	pdb7qcb	1
BxATG16_4	pdb2l5q	1
BxATG16_3	pdb6jxw	1
BxCYP33D3_3	pdb2l05	1
I0QYY0_9GAMM	pdb5krw	1
BxATG16_3	pdb2m8x	1
BxCYP33C4_5	pdb7jyz	1
cyp_33C9_2	pdb2kif	1
Bx_tlp_1_4	pdb2mm6	1
I0QYY0_9GAMM	pdb2lcg	1
BxATG16_3	2kl7	1
Bx_tlp_1_4	pdb3sdr	1
Bx_tlp_1_3	pdb2kt7	1
A0A1I7RL37_BURXY	pdb7jyn	1
cyp_33C9_1	pdb7mzx	1
BxCYP33D3_3	pdb2lk2	1
Bx_tlp_1_3	pdb2kt8	1
BxATG16_3	pdb2ltl	1
BxCYP33C4_5	pdb2n75	1
cyp_33C9_2	pdb2lmd	1
A0A1I7SCF8_BURXY	pdb2l07	1
Bx_tlp_1_3	pdb2kct	1
BxCYP33D3_3	pdb5ks6	1
SapB3_3	pdb2ksi	1
BxATG16_3	pdb6amw	1
BxCYP33D3_3	pdb2l5q	1
I0QYY0_9GAMM	pdb2kt7	1
BxCYP33C4_5	pdb6ppt	1
BxATG16_3	pdb7kix	1
Bx_tlp_1_3	pdb2ma6	1
cyp_33C9_1	pdb2kwb	1
cyp_33C9_1	pdb2lxu	1
BxCYP33D3_3	pdb7kix	1
Bx_tlp_1_4	pdb2lw4	1
I0QYY0_9GAMM	pdb2mv0	1
BxCYP33C4_5	pdb7kix	1
BxATG9_5	2kcx	1
BxATG16_3	pdb7m5t	1
Bx_tlp_1_5	pdb2mv0	1
cyp_33C9_2	pdb6lqz	1
cyp_33C9_2	pdb5zau	1
Bx_tlp_1_3	pdb2l9q	1
cyp_33C9_1	pdb2ma6	1
BxSapB1_1	pdb7sxb	1
BxSapB1_1	pdb2kzv	1
BxATG16_4	pdb2lgh	1
BxATG16_4	pdb2ljl	1
A0A1I7RL37_BURXY	pdb2mh2	1
I0QYY0_9GAMM	pdb2kwb	1
Bx_cpl_3_3	pdb2lx7	1
SapB3_3	pdb7jyz	1
A0A1I7SCF8_BURXY	pdb2kpm	1
Bx_cpl_3_3	pdb2kct	1
A0A1I7SCF8_BURXY	pdb2lch	1
Bx_tlp_1_4	pdb7qcb	1
Bx_Prx_5	pdb6xry	1
BxSapB1_2	pdb7lu8	1
Bx_Prx_5	2lla	1
A0A1I7RL37_BURXY	pdb2l9q	1
BxATG9_5	pdb7kix	1
Bx_Prx_3	pdb2ksi	1
BxCYP33C4_5	pdb2mm5	1
BxCYP33C4_5	pdb2mry	1
A0A1I7SCF8_BURXY	pdb2lna	1
Bx_cpl_3_3	pdb7x5c	1
BxATG16_4	pdb2l9q	1
Bx_tlp_1_5	pdb2lv2	1
Bx_tlp_1_5	pdb6pq2	1
BxATG16_4	pdb3sdv	1
Bx_tlp_1_5	pdb2l09	1
BxSapB1_1	pdb6amv	1
Bx_cpl_3_3	pdb2l0c	1
Bx_tlp_1_5	pdb3sdq	1
Bx_tlp_1_3	2kl7	1
Bx_Prx_3	pdb2kru	1
Bx_Prx_3	2lla	1
Bx_Prx_5	pdb7qcb	1
Bx_Prx_5	pdb2l05	1
BxCYP33C4_5	pdb2mk2	1
Bx_cpl_2_2	pdb7jyn	1
cyp_33C9_1	pdb5nce	1
BxCYP33C4_5	pdb2m8x	1
BxSapB1_2	pdb3sdt	1
BxCYP33C4_5	pdb2lx7	1
BxSapB1_1	pdb2n76	1
BxATG16_3	pdb3sdv	1
A0A1I7RL37_BURXY	pdb2kzx	1
BxATG16_4	pdb2kct	1
BxATG16_4	pdb2kzx	1
Bx_Prx_5	pdb5nce	1
cyp_33C9_2	pdb6xry	1
Bx_cpl_3_3	pdb2kt1	1
BxCYP33D3_3	pdb2krt	1
SapB3_5	pdb6xry	1
BxCYP33C4_5	pdb2kpm	1
BxCYP33C9_2	pdb7kix	1
A0A1I7RL37_BURXY	pdb2lcg	1
BxSapB1_1	pdb7knv	1
cyp_33C9_1	pdb2kz5	1
BxSapB1_1	pdb2l82	1
Bx_cpl_3_3	pdb2ltl	1
Bx_cpl_3_4	pdb2lgh	1
cyp_33C9_2	pdb2lq3	1
BxATG16_3	pdb6pri	1
Bx_tlp_1_3	pdb7qcb	1
Bx_Prx_5	pdb2lw4	1
A0A1I7SCF8_BURXY	pdb7lns	1
BxSapB1_1	pdb5vso	1
Bx_tlp_1_3	pdb2nbn	1
SapB3_3	pdb2mk2	1
Bx_tlp_1_3	pdb2kkq	1
BxCYP33D3_3	pdb6nu4	1
A0A1I7RL37_BURXY	pdb2kd1	1
BxCYP33D3_3	pdb5nce	1
A0A1I7SCF8_BURXY	pdb7jyn	1
I0QYY0_9GAMM	pdb7n99	1
BxCYP33D3_3	pdb2kt7	1
Bx_cpl_2_3	2kl7	1
BxCYP33C9_2	pdb6kna	1
Bx_tlp_1_4	pdb2kt8	1
BxCYP33D3_3	pdb2ljw	1
SapB3_5	2lla	1
SapB3_3	2kcx	1
BxATG16_4	pdb6prj	1
Bx_tlp_1_5	pdb2m16	1
Bx_tlp_1_3	pdb5kp0	1
I0QMH2_9GAMM	pdb2l05	1
cyp_33C9_1	pdb2krt	1
A0A1I7RKM9_BURXY	pdb6xry	1
A0A1I7SCF8_BURXY	pdb8ubh	1
I0QYY0_9GAMM	pdb2lxu	1
BxSapB1_2	pdb2l9p	1
Bx_cpl_2_4	2kyq	1
BxATG16_4	pdb2mm5	1
A0A1I7SCF8_BURXY	pdb6prq	1
A0A1I7RL37_BURXY	2lla	1
BxSapB1_2	pdb6amw	1
cyp_33C9_2	pdb2n66	1
BxCYP33D3_3	pdb2lx7	1
BxCYP33D3_5	2kl7	1
cyp_33C9_1	pdb6ppt	1
A0A1I7RL37_BURXY	pdb6xr7	1
BxCYP33C4_5	pdb2luz	1
BxATG16_4	pdb2kru	1
cyp_33C9_1	pdb2lml	1
BxSapB1_1	pdb2ksh	1
Bx_cpl_3_3	pdb2ksi	1
BxCYP33C4_5	pdb4lej	1
BxSapB1_2	pdb3sdr	1
BxCYP33C9_2	pdb6xry	1
cyp_33C9_1	pdb7sxb	1
Bx_cpl_3_3	pdb2lna	1
A0A1I7RL37_BURXY	pdb2kru	1
BxCYP33C4_5	pdb2lxu	1
Bx_cpl_3_4	pdb2mv0	1
A0A1I7SCF8_BURXY	pdb2n3k	1
BxSapB1_1	pdb2kwb	1
Bx_tlp_1_5	2kyq	1
Bx_tlp_1_3	pdb2luz	1
A0A1I7SCF8_BURXY	pdb2kwb	1
Bx_tlp_1_3	pdb2l0d	1
Bx_tlp_1_4	pdb8ubh	1
A0A1I7SCF8_BURXY	pdb3sdt	1
Bx_cpl_2_2	pdb6xry	1
BxATG16_3	pdb2kpt	1
Bx_cpl_3_4	pdb3sdr	1
BxCYP33C4_5	pdb5vso	1
BxATG16_4	pdb6e4j	1
BxCYP33D3_3	pdb7mzx	1
A0A1I7SCF8_BURXY	pdb2l82	1
SapB3_3	pdb2l3f	1
I0QMH2_9GAMM	pdb6kna	1
SapB3_3	2kyq	1
BxCYP33C4_5	pdb2kl3	1
Bx_cpl_3_4	pdb6xrg	1
BxATG16_4	pdb3sdt	1
Bx_cpl_3_3	pdb2lok	1
BxATG16_3	pdb2kt1	1
BxCYP33C4_5	pdb5krw	1
Bx_cpl_3_3	pdb6xry	1
Bx_tlp_1_3	pdb6pri	1
BxCYP33D3_3	pdb3sdt	1
I0QYY0_9GAMM	pdb6jxu	1
BxATG16_3	pdb3hbh	1
BxATG16_4	pdb2lnu	1
cyp_33C9_2	pdb7knv	1
BxATG16_4	pdb2lml	1
Bx_tlp_1_4	pdb2kct	1
Bx_cpl_3_3	pdb6xr7	1
BxSapB1_2	pdb5uke	1
BxCYP33D3_3	pdb2l3f	1
A0A1I7SCF8_BURXY	pdb2lx7	1
BxSapB1_2	pdb6pqm	1
A0A1I7RKM9_BURXY	pdb2kru	1
Bx_cpl_3_4	pdb7lu8	1
BxATG16_4	pdb2ma6	1
BxCYP33C4_3	2kyq	1
Bx_cpl_3_4	2kl7	1
Bx_tlp_1_5	pdb2lek	1
Bx_cpl_3_3	pdb7mzz	1
BxSapB1_2	pdb3sdq	1
cyp_33C9_1	pdb3hbd	1
BxSapB1_2	pdb2kz5	1
A0A1I7SCF8_BURXY	pdb7kix	1
BxCYP33C4_5	pdb2mbl	1
BxATG16_4	pdb2lna	1
Bx_cpl_3_3	pdb2kpn	1
BxATG16_3	pdb2mbl	1
cyp_33C9_2	pdb3sdr	1
BxATG16_4	pdb2llf	1
BxCYP33D3_3	pdb2m16	1
Bx_tlp_1_4	pdb2mbm	1
A0A1I7RL37_BURXY	pdb2krt	1
BxATG16_3	pdb2lx7	1
cyp_33C9_1	pdb2kvo	1
BxCYP33D3_5	pdb6xrg	1
Bx_cpl_3_4	pdb2kw2	1
Bx_cpl_3_3	pdb6pqe	1
Bx_cpl_3_3	pdb2lnb	1
Bx_tlp_1_3	pdb2l0a	1
BxATG16_3	pdb2luz	1
cyp_33C9_1	pdb6xr7	1
A0A1I7RKM9_BURXY	pdb7jyz	1
BxATG16_4	pdb6o6w	1
I0QYY0_9GAMM	pdb2ljl	1
BxSapB1_2	pdb2mh2	1
Bx_cpl_2_4	2kcx	1
Bx_cpl_3_3	pdb2lv2	1
BxATG16_4	pdb6pq2	1
Bx_Prx_5	pdb6amw	1
A0A1I7RL37_BURXY	pdb7lns	1
Bx_Prx_5	pdb6xr6	1
Bx_cpl_3_4	pdb2n75	1
cyp_33C9_2	pdb2lgh	1
Bx_tlp_1_4	pdb2kif	1
SapB3_3	pdb2l5q	1
cyp_33C9_2	pdb2kzw	1
BxCYP33C4_5	pdb2ljl	1
Bx_cpl_3_4	pdb2kl6	1
A0A1I7SCF8_BURXY	pdb7qcb	1
BxATG16_3	pdb2kt7	1
BxATG16_4	pdb2l08	1
A0A1I7RL37_BURXY	pdb3sdt	1
Bx_tlp_1_5	pdb2lio	1
BxATG16_3	pdb6xrg	1
BxSapB1_2	pdb7kix	1
A0A1I7SCF8_BURXY	pdb4lej	1
Bx_tlp_1_5	pdb2m8x	1
Bx_cpl_3_3	pdb6xr6	1
BxATG9_5	2kyq	1
A0A1I7SCF8_BURXY	pdb2lcg	1
cyp_33C9_1	pdb6cgh	1
I0QYY0_9GAMM	pdb2kkq	1
BxCYP33D3_3	pdb2luz	1
BxSapB1_1	pdb2kpt	1
BxCYP33C9_1	pdb6xr7	1
Bx_tlp_1_3	pdb2lq3	1
Bx_Prx_5	pdb6pqm	1
Bx_tlp_1_4	pdb2lfi	1
cyp_33C9_2	pdb2l0c	1
BxATG9_5	pdb2l07	1
I0QYY0_9GAMM	pdb5kp0	1
BxSapB1_2	pdb2l0d	1
Bx_tlp_1_3	pdb2ljw	1
Bx_tlp_1_4	pdb2l82	1
cyp_33C9_1	pdb2kw6	1
I0QYY0_9GAMM	pdb2kpm	1
Bx_cpl_3_4	pdb3hbe	1
BxSapB1_1	pdb2mh2	1
BxATG16_4	pdb2m47	1
I0QYY0_9GAMM	pdb2ma5	1
BxATG16_4	pdb2mk2	1
cyp_33C9_1	pdb2loy	1
I0QYY0_9GAMM	pdb2kl6	1
Bx_tlp_1_3	pdb2lw4	1
SapB3_5	pdb2l5q	1
BxSapB1_2	pdb2krt	1
A0A1I7SCF8_BURXY	pdb2lmd	1
[truncated: 689 more rows]
